# Supplementary material
Source: PubMed Central journal article supplement (PMC7422124)
Supplement: advancesADV2020001920C-suppl1.pdf [file advancesADV2020001920C-suppl1.pdf]

## American Society of Hematology 2020 Guidelines for AML in Older Adults

### Supplement 1: Panel and Systematic Review Team Membership

**Table:** Panel Members

| <b>ASH Guideline Panel on AML in Older Adults</b> |                                |                                        |
|---------------------------------------------------|--------------------------------|----------------------------------------|
| 1                                                 | Mikkael Sekeres                | Clinical co-chair, Hematology/Oncology |
| 2                                                 | Gordon Guyatt                  | Methods co-chair, Internal Medicine    |
| 3                                                 | Gregory Abel                   | Hematology/Oncology                    |
| 4                                                 | Shabbir Alibhai                | Geriatric oncology                     |
| 5                                                 | Jessica K. Altman              | Hematology/Oncology                    |
| 6                                                 | Romina Brignardello-Petersen** | Methodology                            |
| 7                                                 | Rena Buckstein                 | Hematology/Oncology                    |
| 8                                                 | Hannah Choe                    | Hematology/Oncology, Transplant        |
| 9                                                 | Pinkal Desai                   | Hematology/Oncology                    |
| 10                                                | Harry Erba                     | Hematology/Oncology                    |
| 11                                                | Christopher S. Hourigan**      | Hematology/Oncology, Internal Medicine |
| 12                                                | Thomas W. LeBlanc              | Oncology, Palliative care              |
| 13                                                | Mark Litzow                    | Hematology/Oncology, Internal Medicine |
| 14                                                | Janet MacEachern               | Hematology/Oncology                    |
| 15                                                | Laura C. Michaelis             | Hematology/Oncology                    |
| 16                                                | Sudipto Mukherjee              | Hematology/Oncology                    |
| 17                                                | Kristen O'Dwyer**              | Hematology/Oncology                    |
| 18                                                | Ashley Rosko                   | Hematology/Oncology                    |
| 19                                                | Richard Stone                  | Hematology/Oncology                    |
| 20                                                | Paula Phurrough*               | Patient representative                 |

\*Ms. Phurrough was initially appointed to the panel following the prioritization of guideline questions and health outcomes. She did not participate in reviewing evidence, forming recommendations, or writing the guidelines.

\*\*Drs. Brignardello-Petersen, Hourigan and O'Dwyer were appointed to the panel after the initial review of the evidence was complete. They participated in reviewing the evidence at the final panel meeting, forming recommendations, and writing the guidelines.

**Table:** McMaster GRADE Centre Researchers Contributing to Evidence Syntheses

| <b>McMaster GRADE Centre Researchers</b> |                      |
|------------------------------------------|----------------------|
| 1                                        | Arnav Agarwal        |
| 2                                        | Rigya Arya           |
| 3                                        | Sumedha Arya         |
| 4                                        | Yaping Chang         |
| 5                                        | Luis Colunga-Lozano  |
| 6                                        | Jamie Dawdy          |
| 7                                        | Tahira Devji         |
| 8                                        | Miah Han             |
| 9                                        | QiuKui Hao           |
| 10                                       | Leah Kosyakovsky     |
| 11                                       | Fernando Kenji Nampo |
| 12                                       | Shaneela Shahid      |

|    |               |
|----|---------------|
| 13 | Trevor Teich  |
| 14 | Ambika Tejpal |
