# Supplementary material
Source: PubMed Central journal article supplement (PMC7422124)
Supplement: advancesADV2020001920C-suppl3.pdf [file advancesADV2020001920C-suppl3.pdf]

# Acute Myeloid Leukemia in Older Adults Supplement 3: Disclosure of Interests Forms of Researcher who Contributed to the Guidelines

Arnav Agarwal

Rigya Arya

Sumedha Arya

Yaping Chang

Luis Colunga-Lozano

Jamie Dawdy

Tahira Devji

Miah Han

QiuKui Hao

Leah Kosyakovsky

Fernando Kenji Nampo

Shaneela Shahid

Trevor Teich

Ambika Tejpal

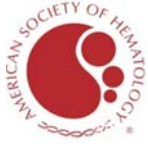

# ASH Guidelines Researcher Declaration of Interests Form

## Part A. Material Interests in Companies

### Equity

1. Do you currently or in the past 24 months have you had equity in any for-profit company that develops, produces, markets, or distributes drugs, devices, services, or therapies used to diagnose, treat, monitor, manage, or alleviate health conditions? Equity includes stock, stock options, and other ownership interests but excludes diversified mutual fund shares.

No

Yes, as described below:

Add rows as needed for each equity interest.

| <i>Company</i> | <i>Description</i> | <i>Date Divested</i> | <i>For ASH Internal Use</i> |
|----------------|--------------------|----------------------|-----------------------------|
|                |                    |                      |                             |
|                |                    |                      |                             |
|                |                    |                      |                             |
|                |                    |                      |                             |

### Patents and Royalties

2. Do you currently or in the past 24 months have you owned patents for or received royalties from any intellectual property or product used to diagnose, treat, monitor, manage, or alleviate health conditions?

No

Yes, as described below:

Add rows as needed for each patent or royalty interest.



## Industry-Funded Research

4. Do you currently or in the past 24 months have you been involved in research funded or supported (e.g., in kind support) by any for-profit company that develops, produces, markets, or distributes drugs, devices, services, or therapies used to diagnose, treat, monitor, manage, or alleviate health conditions?

No

Yes, as described below:

Column 1 Name the company funding or supporting the research.

Column 2 Briefly describe the research project. Indicate if funding or support goes to you directly or to your institution.

Column 3 Describe your role: (a) national or overall principal investigator, (b) member of a steering committee of a study that does not have a principal investigator, (c) site or local investigator. If other than these options, please describe.

Column 4 Indicate when your involvement ended, if applicable. (If your involvement has not yet ended, indicate “current” or “ongoing.”)

Add rows as needed for each research project.

| <i>Company</i> | <i>Description of Research</i> | <i>My Role</i> | <i>End Date</i> | <i>For ASH Internal Use</i> |
|----------------|--------------------------------|----------------|-----------------|-----------------------------|
|                |                                |                |                 |                             |
|                |                                |                |                 |                             |
|                |                                |                |                 |                             |
|                |                                |                |                 |                             |
|                |                                |                |                 |                             |
|                |                                |                |                 |                             |
|                |                                |                |                 |                             |
|                |                                |                |                 |                             |
|                |                                |                |                 |                             |

## My Partner’s or Spouse’s Interests

5. Currently or in the past 24 months has *your partner or spouse* had any of the interests described in questions 1-4?

No

Yes, as described below:

Add rows as needed for each interest.

| <i>Company</i> | <i>Description</i> | <i>End Date</i> | <i>For ASH Internal Use</i> |
|----------------|--------------------|-----------------|-----------------------------|
|                |                    |                 |                             |
|                |                    |                 |                             |
|                |                    |                 |                             |

# Part B. Interests That Are Not Mainly Financial

You have been invited to participate as a researcher on systematic evidence reviews that will inform clinical practice guidelines by the American Society of Hematology on the following topic:

Acute Myeloid Leukemia in Older Adults

The questions that follow are designed to elicit information about personal beliefs, intellectual positions or opinions, institutional relationships, and other interests that are not mainly financial and that may be relevant to guidelines on the above topic.

## Personal Beliefs

1. Do you have strongly held beliefs related to the topic of these guidelines?

No

Yes

If yes, please explain:

## Previously Published Opinions

2. Have you ever authored, coauthored, or publicly provided an opinion related to the topic of these guidelines, e.g., a clinical practice guideline, textbook, review article, meeting poster or presentation, grand rounds talk, letter to the editor?

No

Yes

If yes, what were those views and where were they made?

## Research

3. Currently or in the past 24 months, have you been involved in a leadership role in any research project not already reported under Part A, Question 4, relevant to the topic of these guidelines, e.g., a research project funded by a nonprofit or governmental organization?

No

Yes, as described below:

Column 1 Name the entity funding the research.

Column 2 Describe the research project.

Column 3 Describe your role: (a) national or overall principal investigator, (b) member of a steering committee of a study that does not have a principal investigator, (c) site or local investigator. If other than these options, please describe.

Column 4 Indicate when your involvement ended, if applicable. (If your involvement has not yet ended, indicate “current” or “ongoing.”)

Add rows as needed for each research project.

| <i>Funder</i> | <i>Description of Research</i> | <i>My Role</i> | <i>End Date</i> |
|---------------|--------------------------------|----------------|-----------------|
|               |                                |                |                 |
|               |                                |                |                 |
|               |                                |                |                 |
|               |                                |                |                 |

## Institutional Relationships

4. Could your salary be affected by recommendations on this topic?

No

5. Do you generate revenues for your institution or employer by clinical activity, teaching, speaking, consulting, testifying, writing, or otherwise sharing your knowledge or opinions about this guideline topic?

Don't know

No

Yes

If yes, please explain:

6. Could your institution benefit or be harmed by recommendations of guidelines on this topic?

Don't know

No

Yes

If yes, please explain:

## Career Advancement

7. How would you characterize the support you would receive from your primary mentor, institution, or other entities if your contributions to guidelines on this topic generated a strong reaction from peers outside your institution?

## Advocacy and Policy Positions

8. Do you work for or are you a member of an organization with a stated position related to the topic of these guidelines, e.g., position statement, editorial, blog, amicus brief, or legislature or legal testimony?

No

Yes. Name of organization(s): \_\_\_\_

If yes, are you involved in formulating or voting for positions?

No

Yes

If yes, could recommendations of these guidelines conflict with policies you have promoted or are obligated to follow?

Don't know or not applicable

No

Yes

If yes, please explain:

## Professional Specialty

9. What is your primary profession? If you are a clinician, what is your clinical specialty or subspecialty?

Internal Medicine Resident Physician.

10. Do you prescribe or otherwise recommend diagnostic tests or treatments that may be addressed by these guidelines?

No

Yes

If yes, please explain:



## Expected Interests

11. Do you expect new financial or nonfinancial interests relevant to the topic of these guidelines not already declared in Part A or Part B of this form?

No

Yes

If yes, please describe:

## Part C. Summary (ASH Internal Use)

ASH will review your disclosures and summarize here interests that are judged to be current, material, and with an affected company. You will then be invited to review our determinations and to agree to make all parts of this form (A, B and C) publicly available.

|                  |                                          |
|------------------|------------------------------------------|
| Guideline topic: | AML in Older Adults (systematic reviews) |
|------------------|------------------------------------------|

| <i>Approved to participate?</i> | <i>Reviewer name and date</i> | <i>Notes</i>                                                                                          |
|---------------------------------|-------------------------------|-------------------------------------------------------------------------------------------------------|
| Yes                             | 1/12/2020 Alexander           | No current conflicts of interest. On 1/12/2020, Arnav Agarwal confirmed all information in this form. |
|                                 |                               |                                                                                                       |
|                                 |                               |                                                                                                       |
|                                 |                               |                                                                                                       |

Summarize all current material interests in affected companies described above:

| <i>Company</i> | <i>Description</i> | <i>Disclosure Date</i> | <i>ASH Notes</i> |
|----------------|--------------------|------------------------|------------------|
|                |                    |                        |                  |
|                |                    |                        |                  |
|                |                    |                        |                  |
|                |                    |                        |                  |

Notes:

|  |
|--|
|  |
|--|



# ASH Guidelines Researcher Declaration of Interests Form

## Part A. Material Interests in Companies

### Equity

1. Do you currently or in the past 24 months have you had equity in any for-profit company that develops, produces, markets, or distributes drugs, devices, services, or therapies used to diagnose, treat, monitor, manage, or alleviate health conditions? Equity includes stock, stock options, and other ownership interests but excludes diversified mutual fund shares.

No

Yes, as described below:

Add rows as needed for each equity interest.

| <i>Company</i> | <i>Description</i> | <i>Date Divested</i> | <i>For ASH Internal Use</i> |
|----------------|--------------------|----------------------|-----------------------------|
|                |                    |                      |                             |
|                |                    |                      |                             |
|                |                    |                      |                             |
|                |                    |                      |                             |

### Patents and Royalties

2. Do you currently or in the past 24 months have you owned patents for or received royalties from any intellectual property or product used to diagnose, treat, monitor, manage, or alleviate health conditions?

No

Yes, as described below:

Add rows as needed for each patent or royalty interest.



## Industry-Funded Research

4. Do you currently or in the past 24 months have you been involved in research funded or supported (e.g., in kind support) by any for-profit company that develops, produces, markets, or distributes drugs, devices, services, or therapies used to diagnose, treat, monitor, manage, or alleviate health conditions?

No

Yes, as described below:

Column 1 Name the company funding or supporting the research.

Column 2 Briefly describe the research project. Indicate if funding or support goes to you directly or to your institution.

Column 3 Describe your role: (a) national or overall principal investigator, (b) member of a steering committee of a study that does not have a principal investigator, (c) site or local investigator. If other than these options, please describe.

Column 4 Indicate when your involvement ended, if applicable. (If your involvement has not yet ended, indicate “current” or “ongoing.”)

Add rows as needed for each research project.

| <i>Company</i> | <i>Description of Research</i> | <i>My Role</i> | <i>End Date</i> | <i>For ASH Internal Use</i> |
|----------------|--------------------------------|----------------|-----------------|-----------------------------|
|                |                                |                |                 |                             |
|                |                                |                |                 |                             |
|                |                                |                |                 |                             |
|                |                                |                |                 |                             |
|                |                                |                |                 |                             |
|                |                                |                |                 |                             |
|                |                                |                |                 |                             |
|                |                                |                |                 |                             |
|                |                                |                |                 |                             |

## My Partner’s or Spouse’s Interests

5. Currently or in the past 24 months has *your partner or spouse* had any of the interests described in questions 1-4?

No

Yes, as described below:

Add rows as needed for each interest.

| <i>Company</i> | <i>Description</i> | <i>End Date</i> | <i>For ASH Internal Use</i> |
|----------------|--------------------|-----------------|-----------------------------|
|                |                    |                 |                             |
|                |                    |                 |                             |
|                |                    |                 |                             |

# Part B. Interests That Are Not Mainly Financial

You have been invited to participate as a researcher on systematic evidence reviews that will inform clinical practice guidelines by the American Society of Hematology on the following topic:

Acute Myeloid Leukemia in Older Adults

The questions that follow are designed to elicit information about personal beliefs, intellectual positions or opinions, institutional relationships, and other interests that are not mainly financial and that may be relevant to guidelines on the above topic.

## Personal Beliefs

1. Do you have strongly held beliefs related to the topic of these guidelines?

No

Yes

If yes, please explain:

## Previously Published Opinions

2. Have you ever authored, coauthored, or publicly provided an opinion related to the topic of these guidelines, e.g., a clinical practice guideline, textbook, review article, meeting poster or presentation, grand rounds talk, letter to the editor?

No

Yes

If yes, what were those views and where were they made?

## Research

3. Currently or in the past 24 months, have you been involved in a leadership role in any research project not already reported under Part A, Question 4, relevant to the topic of these guidelines, e.g., a research project funded by a nonprofit or governmental organization?

No

Yes, as described below:

Column 1 Name the entity funding the research.

Column 2 Describe the research project.

Column 3 Describe your role: (a) national or overall principal investigator, (b) member of a steering committee of a study that does not have a principal investigator, (c) site or local investigator. If other than these options, please describe.

Column 4 Indicate when your involvement ended, if applicable. (If your involvement has not yet ended, indicate “current” or “ongoing.”)

Add rows as needed for each research project.

| <i>Funder</i> | <i>Description of Research</i> | <i>My Role</i> | <i>End Date</i> |
|---------------|--------------------------------|----------------|-----------------|
|               |                                |                |                 |
|               |                                |                |                 |
|               |                                |                |                 |
|               |                                |                |                 |

## Institutional Relationships

4. Could your salary be affected by recommendations on this topic?

No

5. Do you generate revenues for your institution or employer by clinical activity, teaching, speaking, consulting, testifying, writing, or otherwise sharing your knowledge or opinions about this guideline topic?

Don't know

No

Yes

If yes, please explain:

6. Could your institution benefit or be harmed by recommendations of guidelines on this topic?

Don't know

No

Yes

If yes, please explain:



## Career Advancement

7. How would you characterize the support you would receive from your primary mentor, institution, or other entities if your contributions to guidelines on this topic generated a strong reaction from peers outside your institution?

I would assume the support would be in the form of words of encouragement.

## Advocacy and Policy Positions

8. Do you work for or are you a member of an organization with a stated position related to the topic of these guidelines, e.g., position statement, editorial, blog, amicus brief, or legislature or legal testimony?

No

Yes. Name of organization(s): \_\_\_\_

If yes, are you involved in formulating or voting for positions?

No

Yes

If yes, could recommendations of these guidelines conflict with policies you have promoted or are obligated to follow?

Don't know or not applicable

No

Yes

If yes, please explain:

## Professional Specialty

9. What is your primary profession? If you are a clinician, what is your clinical specialty or subspecialty?

Medical student

10. Do you prescribe or otherwise recommend diagnostic tests or treatments that may be addressed by these guidelines?

No

Yes

If yes, please explain:

## Expected Interests

11. Do you expect new financial or nonfinancial interests relevant to the topic of these guidelines not already declared in Part A or Part B of this form?

No

Yes

If yes, please describe:

## Part C. Summary (ASH Internal Use)

ASH will review your disclosures and summarize here interests that are judged to be current, material, and with an affected company. You will then be invited to review our determinations and to agree to make all parts of this form (A, B and C) publicly available.

|                  |                                          |
|------------------|------------------------------------------|
| Guideline topic: | AML in Older Adults (systematic reviews) |
|------------------|------------------------------------------|

| <i>Approved to participate?</i> | <i>Reviewer name and date</i> | <i>Notes</i>                                                     |
|---------------------------------|-------------------------------|------------------------------------------------------------------|
| Yes                             | 1/13/2020 Alexander           | On 1/13/2020, Rigya Arya confirmed all information in this form. |
|                                 |                               |                                                                  |
|                                 |                               |                                                                  |
|                                 |                               |                                                                  |

Summarize all current material interests in affected companies described above:

| <i>Company</i> | <i>Description</i> | <i>Disclosure Date</i> | <i>ASH Notes</i> |
|----------------|--------------------|------------------------|------------------|
|                |                    |                        |                  |
|                |                    |                        |                  |
|                |                    |                        |                  |
|                |                    |                        |                  |

Notes:

|  |
|--|
|  |
|--|



# ASH Guidelines Researcher Declaration of Interests Form

## Part A. Material Interests in Companies

### Equity

1. Do you currently or in the past 24 months have you had equity in any for-profit company that develops, produces, markets, or distributes drugs, devices, services, or therapies used to diagnose, treat, monitor, manage, or alleviate health conditions? Equity includes stock, stock options, and other ownership interests but excludes diversified mutual fund shares.

No

Yes, as described below:

Add rows as needed for each equity interest.

| <i>Company</i> | <i>Description</i> | <i>Date Divested</i> | <i>For ASH Internal Use</i> |
|----------------|--------------------|----------------------|-----------------------------|
|                |                    |                      |                             |
|                |                    |                      |                             |
|                |                    |                      |                             |
|                |                    |                      |                             |

### Patents and Royalties

2. Do you currently or in the past 24 months have you owned patents for or received royalties from any intellectual property or product used to diagnose, treat, monitor, manage, or alleviate health conditions?

No

Yes, as described below:

Add rows as needed for each patent or royalty interest.



### Industry-Funded Research

4. Do you currently or in the past 24 months have you been involved in research funded or supported (e.g., in kind support) by any for-profit company that develops, produces, markets, or distributes drugs, devices, services, or therapies used to diagnose, treat, monitor, manage, or alleviate health conditions?

No

Yes, as described below:

Column 1 Name the company funding or supporting the research.

Column 2 Briefly describe the research project. Indicate if funding or support goes to you directly or to your institution.

Column 3 Describe your role: (a) national or overall principal investigator, (b) member of a steering committee of a study that does not have a principal investigator, (c) site or local investigator. If other than these options, please describe.

Column 4 Indicate when your involvement ended, if applicable. (If your involvement has not yet ended, indicate “current” or “ongoing.”)

Add rows as needed for each research project.

| <i>Company</i> | <i>Description of Research</i> | <i>My Role</i> | <i>End Date</i> | <i>For ASH Internal Use</i> |
|----------------|--------------------------------|----------------|-----------------|-----------------------------|
|                |                                |                |                 |                             |
|                |                                |                |                 |                             |
|                |                                |                |                 |                             |
|                |                                |                |                 |                             |
|                |                                |                |                 |                             |
|                |                                |                |                 |                             |
|                |                                |                |                 |                             |
|                |                                |                |                 |                             |
|                |                                |                |                 |                             |

### My Partner’s or Spouse’s Interests

5. Currently or in the past 24 months has *your partner or spouse* had any of the interests described in questions 1-4?

No

Yes, as described below:

Add rows as needed for each interest.

| <i>Company</i> | <i>Description</i> | <i>End Date</i> | <i>For ASH Internal Use</i> |
|----------------|--------------------|-----------------|-----------------------------|
|                |                    |                 |                             |
|                |                    |                 |                             |
|                |                    |                 |                             |

# Part B. Interests That Are Not Mainly Financial

You have been invited to participate as a researcher on systematic evidence reviews that will inform clinical practice guidelines by the American Society of Hematology on the following topic:

Acute Myeloid Leukemia in Older Adults

The questions that follow are designed to elicit information about personal beliefs, intellectual positions or opinions, institutional relationships, and other interests that are not mainly financial and that may be relevant to guidelines on the above topic.

## Personal Beliefs

1. Do you have strongly held beliefs related to the topic of these guidelines?

No

Yes

If yes, please explain:

## Previously Published Opinions

2. Have you ever authored, coauthored, or publicly provided an opinion related to the topic of these guidelines, e.g., a clinical practice guideline, textbook, review article, meeting poster or presentation, grand rounds talk, letter to the editor?

No

Yes

If yes, what were those views and where were they made?

## Research

3. Currently or in the past 24 months, have you been involved in a leadership role in any research project not already reported under Part A, Question 4, relevant to the topic of these guidelines, e.g., a research project funded by a nonprofit or governmental organization?

No



Yes, as described below:

Column 1 Name the entity funding the research.

Column 2 Describe the research project.

Column 3 Describe your role: (a) national or overall principal investigator, (b) member of a steering committee of a study that does not have a principal investigator, (c) site or local investigator. If other than these options, please describe.

Column 4 Indicate when your involvement ended, if applicable. (If your involvement has not yet ended, indicate “current” or “ongoing.”)

Add rows as needed for each research project.

| <i>Funder</i> | <i>Description of Research</i> | <i>My Role</i> | <i>End Date</i> |
|---------------|--------------------------------|----------------|-----------------|
|               |                                |                |                 |
|               |                                |                |                 |
|               |                                |                |                 |
|               |                                |                |                 |

### Institutional Relationships

4. Could your salary be affected by recommendations on this topic?

No

5. Do you generate revenues for your institution or employer by clinical activity, teaching, speaking, consulting, testifying, writing, or otherwise sharing your knowledge or opinions about this guideline topic?

Don't know

No

Yes

If yes, please explain:

6. Could your institution benefit or be harmed by recommendations of guidelines on this topic?

Don't know

No

Yes

If yes, please explain:

## Career Advancement

7. How would you characterize the support you would receive from your primary mentor, institution, or other entities if your contributions to guidelines on this topic generated a strong reaction from peers outside your institution?

I am unsure of this at the moment.

## Advocacy and Policy Positions

8. Do you work for or are you a member of an organization with a stated position related to the topic of these guidelines, e.g., position statement, editorial, blog, amicus brief, or legislature or legal testimony?

No

Yes. Name of organization(s): \_\_\_\_

If yes, are you involved in formulating or voting for positions?

No

Yes

If yes, could recommendations of these guidelines conflict with policies you have promoted or are obligated to follow?

Don't know or not applicable

No

Yes

If yes, please explain:

## Professional Specialty

9. What is your primary profession? If you are a clinician, what is your clinical specialty or subspecialty?

Internal Medicine Resident (PGY3)

10. Do you prescribe or otherwise recommend diagnostic tests or treatments that may be addressed by these guidelines?

No

Yes

If yes, please explain:

## Expected Interests

11. Do you expect new financial or nonfinancial interests relevant to the topic of these guidelines not already declared in Part A or Part B of this form?

No

Yes

If yes, please describe:

## Part C. Summary (ASH Internal Use)

ASH will review your disclosures and summarize here interests that are judged to be current, material, and with an affected company. You will then be invited to review our determinations and to agree to make all parts of this form (A, B and C) publicly available.

|                  |                                          |
|------------------|------------------------------------------|
| Guideline topic: | AML in Older Adults (systematic reviews) |
|------------------|------------------------------------------|

| <i>Approved to participate?</i> | <i>Reviewer name and date</i> | <i>Notes</i>                                                                                         |
|---------------------------------|-------------------------------|------------------------------------------------------------------------------------------------------|
| Yes                             | Alexander 1/10/2020           | No current conflicts of interest. On 1/10/2020, Sumedha Arya confirmed all information in this form. |
|                                 |                               |                                                                                                      |
|                                 |                               |                                                                                                      |
|                                 |                               |                                                                                                      |

Summarize all current material interests in affected companies described above:

| <i>Company</i> | <i>Description</i> | <i>Disclosure Date</i> | <i>ASH Notes</i> |
|----------------|--------------------|------------------------|------------------|
|                |                    |                        |                  |
|                |                    |                        |                  |
|                |                    |                        |                  |
|                |                    |                        |                  |

Notes:

|  |
|--|
|  |
|--|

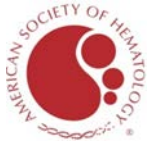

# ASH Guidelines Researcher Declaration of Interests Form

## Part A. Material Interests in Companies

### Equity

1. Do you currently or in the past 24 months have you had equity in any for-profit company that develops, produces, markets, or distributes drugs, devices, services, or therapies used to diagnose, treat, monitor, manage, or alleviate health conditions? Equity includes stock, stock options, and other ownership interests but excludes diversified mutual fund shares.

- No
- Yes, as described below:

Add rows as needed for each equity interest.

| <i>Company</i> | <i>Description</i> | <i>Date Divested</i> | <i>For ASH Internal Use</i> |
|----------------|--------------------|----------------------|-----------------------------|
|                |                    |                      |                             |
|                |                    |                      |                             |
|                |                    |                      |                             |
|                |                    |                      |                             |

### Patents and Royalties

2. Do you currently or in the past 24 months have you owned patents for or received royalties from any intellectual property or product used to diagnose, treat, monitor, manage, or alleviate health conditions?

- No
- Yes, as described below:

Add rows as needed for each patent or royalty interest.



## Industry-Funded Research

4. Do you currently or in the past 24 months have you been involved in research funded or supported (e.g., in kind support) by any for-profit company that develops, produces, markets, or distributes drugs, devices, services, or therapies used to diagnose, treat, monitor, manage, or alleviate health conditions?

No

Yes, as described below:

Column 1 Name the company funding or supporting the research.

Column 2 Briefly describe the research project. Indicate if funding or support goes to you directly or to your institution.

Column 3 Describe your role: (a) national or overall principal investigator, (b) member of a steering committee of a study that does not have a principal investigator, (c) site or local investigator. If other than these options, please describe.

Column 4 Indicate when your involvement ended, if applicable. (If your involvement has not yet ended, indicate “current” or “ongoing.”)

Add rows as needed for each research project.

| <i>Company</i> | <i>Description of Research</i> | <i>My Role</i> | <i>End Date</i> | <i>For ASH Internal Use</i> |
|----------------|--------------------------------|----------------|-----------------|-----------------------------|
|                |                                |                |                 |                             |
|                |                                |                |                 |                             |
|                |                                |                |                 |                             |
|                |                                |                |                 |                             |
|                |                                |                |                 |                             |
|                |                                |                |                 |                             |
|                |                                |                |                 |                             |
|                |                                |                |                 |                             |
|                |                                |                |                 |                             |

## My Partner’s or Spouse’s Interests

5. Currently or in the past 24 months has *your partner or spouse* had any of the interests described in questions 1-4?

No

Yes, as described below:

Add rows as needed for each interest.

| <i>Company</i> | <i>Description</i> | <i>End Date</i> | <i>For ASH Internal Use</i> |
|----------------|--------------------|-----------------|-----------------------------|
|                |                    |                 |                             |
|                |                    |                 |                             |
|                |                    |                 |                             |



# Part B. Interests That Are Not Mainly Financial

You have been invited to participate as a researcher on systematic evidence reviews that will inform clinical practice guidelines by the American Society of Hematology on the following topic:

Acute Myeloid Leukemia in Older Adults

The questions that follow are designed to elicit information about personal beliefs, intellectual positions or opinions, institutional relationships, and other interests that are not mainly financial and that may be relevant to guidelines on the above topic.

## Personal Beliefs

1. Do you have strongly held beliefs related to the topic of these guidelines?

No

Yes

If yes, please explain:

## Previously Published Opinions

2. Have you ever authored, coauthored, or publicly provided an opinion related to the topic of these guidelines, e.g., a clinical practice guideline, textbook, review article, meeting poster or presentation, grand rounds talk, letter to the editor?

No

Yes

If yes, what were those views and where were they made?

## Research

3. Currently or in the past 24 months, have you been involved in a leadership role in any research project not already reported under Part A, Question 4, relevant to the topic of these guidelines, e.g., a research project funded by a nonprofit or governmental organization?

No

Yes, as described below:

Column 1 Name the entity funding the research.

Column 2 Describe the research project.

Column 3 Describe your role: (a) national or overall principal investigator, (b) member of a steering committee of a study that does not have a principal investigator, (c) site or local investigator. If other than these options, please describe.

Column 4 Indicate when your involvement ended, if applicable. (If your involvement has not yet ended, indicate “current” or “ongoing.”)

Add rows as needed for each research project.

| <i>Funder</i> | <i>Description of Research</i> | <i>My Role</i> | <i>End Date</i> |
|---------------|--------------------------------|----------------|-----------------|
|               |                                |                |                 |
|               |                                |                |                 |
|               |                                |                |                 |
|               |                                |                |                 |

### Institutional Relationships

4. Could your salary be affected by recommendations on this topic?

No

5. Do you generate revenues for your institution or employer by clinical activity, teaching, speaking, consulting, testifying, writing, or otherwise sharing your knowledge or opinions about this guideline topic?

Don't know

No

Yes

If yes, please explain:

6. Could your institution benefit or be harmed by recommendations of guidelines on this topic?

Don't know

No

Yes

If yes, please explain:

## Career Advancement

7. How would you characterize the support you would receive from your primary mentor, institution, or other entities if your contributions to guidelines on this topic generated a strong reaction from peers outside your institution?      None.

## Advocacy and Policy Positions

8. Do you work for or are you a member of an organization with a stated position related to the topic of these guidelines, e.g., position statement, editorial, blog, amicus brief, or legislature or legal testimony?

No

Yes. Name of organization(s): \_\_\_\_

If yes, are you involved in formulating or voting for positions?

No

Yes

If yes, could recommendations of these guidelines conflict with policies you have promoted or are obligated to follow?

Don't know or not applicable

No

Yes

If yes, please explain:

## Professional Specialty

9. What is your primary profession? If you are a clinician, what is your clinical specialty or subspecialty?

Assistant Professor (part-time), Data Scientist

10. Do you prescribe or otherwise recommend diagnostic tests or treatments that may be addressed by these guidelines?

No

Yes

If yes, please explain:

## Expected Interests

11. Do you expect new financial or nonfinancial interests relevant to the topic of these guidelines not already declared in Part A or Part B of this form?

No

Yes

If yes, please describe:

# Part C. Summary (ASH Internal Use)

ASH will review your disclosures and summarize here interests that are judged to be current, material, and with an affected company. You will then be invited to review our determinations and to agree to make all parts of this form (A, B and C) publicly available.

|                  |                                          |
|------------------|------------------------------------------|
| Guideline topic: | AML in Older Adults (systematic reviews) |
|------------------|------------------------------------------|

| <i>Approved to participate?</i> | <i>Reviewer name and date</i> | <i>Notes</i> |
|---------------------------------|-------------------------------|--------------|
|                                 |                               |              |
|                                 |                               |              |
|                                 |                               |              |
|                                 |                               |              |

Summarize all current material interests in affected companies described above:

| <i>Company</i> | <i>Description</i> | <i>Disclosure Date</i> | <i>ASH Notes</i> |
|----------------|--------------------|------------------------|------------------|
|                |                    |                        |                  |
|                |                    |                        |                  |
|                |                    |                        |                  |
|                |                    |                        |                  |

Notes:

|  |
|--|
|  |
|--|



# ASH Guidelines Researcher Declaration of Interests Form

## Part A. Material Interests in Companies

### Equity

1. Do you currently or in the past 24 months have you had equity in any for-profit company that develops, produces, markets, or distributes drugs, devices, services, or therapies used to diagnose, treat, monitor, manage, or alleviate health conditions? Equity includes stock, stock options, and other ownership interests but excludes diversified mutual fund shares.

No

Yes, as described below:

Add rows as needed for each equity interest.

| <i>Company</i> | <i>Description</i> | <i>Date Divested</i> | <i>For ASH Internal Use</i> |
|----------------|--------------------|----------------------|-----------------------------|
|                |                    |                      |                             |
|                |                    |                      |                             |
|                |                    |                      |                             |
|                |                    |                      |                             |

### Patents and Royalties

2. Do you currently or in the past 24 months have you owned patents for or received royalties from any intellectual property or product used to diagnose, treat, monitor, manage, or alleviate health conditions?

No

Yes, as described below:

Add rows as needed for each patent or royalty interest.



## Industry-Funded Research

4. Do you currently or in the past 24 months have you been involved in research funded or supported (e.g., in kind support) by any for-profit company that develops, produces, markets, or distributes drugs, devices, services, or therapies used to diagnose, treat, monitor, manage, or alleviate health conditions?

No

Yes, as described below:

Column 1 Name the company funding or supporting the research.

Column 2 Briefly describe the research project. Indicate if funding or support goes to you directly or to your institution.

Column 3 Describe your role: (a) national or overall principal investigator, (b) member of a steering committee of a study that does not have a principal investigator, (c) site or local investigator. If other than these options, please describe.

Column 4 Indicate when your involvement ended, if applicable. (If your involvement has not yet ended, indicate “current” or “ongoing.”)

Add rows as needed for each research project.

| <i>Company</i> | <i>Description of Research</i> | <i>My Role</i> | <i>End Date</i> | <i>For ASH Internal Use</i> |
|----------------|--------------------------------|----------------|-----------------|-----------------------------|
|                |                                |                |                 |                             |
|                |                                |                |                 |                             |
|                |                                |                |                 |                             |
|                |                                |                |                 |                             |
|                |                                |                |                 |                             |
|                |                                |                |                 |                             |
|                |                                |                |                 |                             |
|                |                                |                |                 |                             |
|                |                                |                |                 |                             |

## My Partner’s or Spouse’s Interests

5. Currently or in the past 24 months has *your partner or spouse* had any of the interests described in questions 1-4?

No

Yes, as described below:



Add rows as needed for each interest.

| <i>Company</i> | <i>Description</i> | <i>End Date</i> | <i>For ASH Internal Use</i> |
|----------------|--------------------|-----------------|-----------------------------|
|                |                    |                 |                             |
|                |                    |                 |                             |
|                |                    |                 |                             |

# Part B. Interests That Are Not Mainly Financial

You have been invited to participate as a researcher on systematic evidence reviews that will inform clinical practice guidelines by the American Society of Hematology on the following topic:

Acute Myeloid Leukemia in Older Adults

The questions that follow are designed to elicit information about personal beliefs, intellectual positions or opinions, institutional relationships, and other interests that are not mainly financial and that may be relevant to guidelines on the above topic.

## Personal Beliefs

1. Do you have strongly held beliefs related to the topic of these guidelines?

No

Yes

If yes, please explain:

## Previously Published Opinions

2. Have you ever authored, coauthored, or publicly provided an opinion related to the topic of these guidelines, e.g., a clinical practice guideline, textbook, review article, meeting poster or presentation, grand rounds talk, letter to the editor?

No

Yes

If yes, what were those views and where were they made?

## Research

3. Currently or in the past 24 months, have you been involved in a leadership role in any research project not already reported under Part A, Question 4, relevant to the topic of these guidelines, e.g., a research project funded by a nonprofit or governmental organization?

No

Yes, as described below:

Column 1 Name the entity funding the research.

Column 2 Describe the research project.

Column 3 Describe your role: (a) national or overall principal investigator, (b) member of a steering committee of a study that does not have a principal investigator, (c) site or local investigator. If other than these options, please describe.

Column 4 Indicate when your involvement ended, if applicable. (If your involvement has not yet ended, indicate “current” or “ongoing.”)

Add rows as needed for each research project.

| <i>Funder</i> | <i>Description of Research</i> | <i>My Role</i> | <i>End Date</i> |
|---------------|--------------------------------|----------------|-----------------|
|               |                                |                |                 |
|               |                                |                |                 |
|               |                                |                |                 |
|               |                                |                |                 |

## Institutional Relationships

4. Could your salary be affected by recommendations on this topic?

No

5. Do you generate revenues for your institution or employer by clinical activity, teaching, speaking, consulting, testifying, writing, or otherwise sharing your knowledge or opinions about this guideline topic?

Don't know

No

Yes

If yes, please explain:

6. Could your institution benefit or be harmed by recommendations of guidelines on this topic?

Don't know

No

Yes

If yes, please explain:

## Career Advancement

7. How would you characterize the support you would receive from your primary mentor, institution, or other entities if your contributions to guidelines on this topic generated a strong reaction from peers outside your institution?

## Advocacy and Policy Positions

8. Do you work for or are you a member of an organization with a stated position related to the topic of these guidelines, e.g., position statement, editorial, blog, amicus brief, or legislature or legal testimony?

No

Yes. Name of organization(s): \_\_\_\_

If yes, are you involved in formulating or voting for positions?

No

Yes

If yes, could recommendations of these guidelines conflict with policies you have promoted or are obligated to follow?

Don't know or not applicable

No

Yes

If yes, please explain:

## Professional Specialty

9. What is your primary profession? If you are a clinician, what is your clinical specialty or subspecialty?

**Internal Medicine/Critical care physician**

10. Do you prescribe or otherwise recommend diagnostic tests or treatments that may be addressed by these guidelines?

No

Yes

If yes, please explain:

## Expected Interests

11. Do you expect new financial or nonfinancial interests relevant to the topic of these guidelines not already declared in Part A or Part B of this form?

No

Yes

If yes, please describe:

## Part C. Summary (ASH Internal Use)

ASH will review your disclosures and summarize here interests that are judged to be current, material, and with an affected company. You will then be invited to review our determinations and to agree to make all parts of this form (A, B and C) publicly available.

|                  |                                          |
|------------------|------------------------------------------|
| Guideline topic: | AML in Older Adults (systematic reviews) |
|------------------|------------------------------------------|

| <i>Approved to participate?</i> | <i>Reviewer name and date</i> | <i>Notes</i>                                                                                                |
|---------------------------------|-------------------------------|-------------------------------------------------------------------------------------------------------------|
| Yes                             | Alexander 1/13/2020           | No current conflicts of interest. On 1/13/2020, Luis Colunga Lozano confirmed all information in this form. |
|                                 |                               |                                                                                                             |
|                                 |                               |                                                                                                             |
|                                 |                               |                                                                                                             |

Summarize all current material interests in affected companies described above:

| <i>Company</i> | <i>Description</i> | <i>Disclosure Date</i> | <i>ASH Notes</i> |
|----------------|--------------------|------------------------|------------------|
|                |                    |                        |                  |
|                |                    |                        |                  |
|                |                    |                        |                  |
|                |                    |                        |                  |

Notes:

|  |
|--|
|  |
|--|

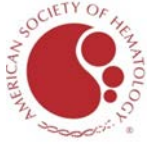

# ASH Guidelines Researcher Declaration of Interests Form

## Part A. Material Interests in Companies

### Equity

1. Do you currently or in the past 24 months have you had equity in any for-profit company that develops, produces, markets, or distributes drugs, devices, services, or therapies used to diagnose, treat, monitor, manage, or alleviate health conditions? Equity includes stock, stock options, and other ownership interests but excludes diversified mutual fund shares.

No

Yes, as described below:

Add rows as needed for each equity interest.

| <i>Company</i> | <i>Description</i> | <i>Date Divested</i> | <i>For ASH Internal Use</i> |
|----------------|--------------------|----------------------|-----------------------------|
|                |                    |                      |                             |
|                |                    |                      |                             |
|                |                    |                      |                             |
|                |                    |                      |                             |

### Patents and Royalties

2. Do you currently or in the past 24 months have you owned patents for or received royalties from any intellectual property or product used to diagnose, treat, monitor, manage, or alleviate health conditions?

No

Yes, as described below:

Add rows as needed for each patent or royalty interest.





## Industry-Funded Research

4. Do you currently or in the past 24 months have you been involved in research funded or supported (e.g., in kind support) by any for-profit company that develops, produces, markets, or distributes drugs, devices, services, or therapies used to diagnose, treat, monitor, manage, or alleviate health conditions?

No

Yes, as described below:

Column 1 Name the company funding or supporting the research.

Column 2 Briefly describe the research project. Indicate if funding or support goes to you directly or to your institution.

Column 3 Describe your role: (a) national or overall principal investigator, (b) member of a steering committee of a study that does not have a principal investigator, (c) site or local investigator. If other than these options, please describe.

Column 4 Indicate when your involvement ended, if applicable. (If your involvement has not yet ended, indicate “current” or “ongoing.”)

Add rows as needed for each research project.

| <i>Company</i> | <i>Description of Research</i> | <i>My Role</i> | <i>End Date</i> | <i>For ASH Internal Use</i> |
|----------------|--------------------------------|----------------|-----------------|-----------------------------|
|                |                                |                |                 |                             |
|                |                                |                |                 |                             |
|                |                                |                |                 |                             |
|                |                                |                |                 |                             |
|                |                                |                |                 |                             |
|                |                                |                |                 |                             |
|                |                                |                |                 |                             |
|                |                                |                |                 |                             |
|                |                                |                |                 |                             |

## My Partner’s or Spouse’s Interests

5. Currently or in the past 24 months has *your partner or spouse* had any of the interests described in questions 1-4?

No

Yes, as described below:

Add rows as needed for each interest.

| <i>Company</i> | <i>Description</i> | <i>End Date</i> | <i>For ASH Internal Use</i> |
|----------------|--------------------|-----------------|-----------------------------|
|                |                    |                 |                             |
|                |                    |                 |                             |
|                |                    |                 |                             |

# Part B. Interests That Are Not Mainly Financial

You have been invited to participate as a researcher on systematic evidence reviews that will inform clinical practice guidelines by the American Society of Hematology on the following topic:

Acute Myeloid Leukemia in Older Adults

The questions that follow are designed to elicit information about personal beliefs, intellectual positions or opinions, institutional relationships, and other interests that are not mainly financial and that may be relevant to guidelines on the above topic.

## Personal Beliefs

1. Do you have strongly held beliefs related to the topic of these guidelines?

No

Yes

If yes, please explain:

## Previously Published Opinions

2. Have you ever authored, coauthored, or publicly provided an opinion related to the topic of these guidelines, e.g., a clinical practice guideline, textbook, review article, meeting poster or presentation, grand rounds talk, letter to the editor?

No

Yes

If yes, what were those views and where were they made?

## Research

3. Currently or in the past 24 months, have you been involved in a leadership role in any research project not already reported under Part A, Question 4, relevant to the topic of these guidelines, e.g., a research project funded by a nonprofit or governmental organization?

No

Yes, as described below:

Column 1 Name the entity funding the research.

Column 2 Describe the research project.

Column 3 Describe your role: (a) national or overall principal investigator, (b) member of a steering committee of a study that does not have a principal investigator, (c) site or local investigator. If other than these options, please describe.

Column 4 Indicate when your involvement ended, if applicable. (If your involvement has not yet ended, indicate “current” or “ongoing.”)

Add rows as needed for each research project.

| <i>Funder</i> | <i>Description of Research</i> | <i>My Role</i> | <i>End Date</i> |
|---------------|--------------------------------|----------------|-----------------|
|               |                                |                |                 |
|               |                                |                |                 |
|               |                                |                |                 |
|               |                                |                |                 |

## Institutional Relationships

4. Could your salary be affected by recommendations on this topic?

No

5. Do you generate revenues for your institution or employer by clinical activity, teaching, speaking, consulting, testifying, writing, or otherwise sharing your knowledge or opinions about this guideline topic?

Don't know

No

Yes

If yes, please explain:

6. Could your institution benefit or be harmed by recommendations of guidelines on this topic?

Don't know

No

Yes

If yes, please explain:

## Career Advancement

7. How would you characterize the support you would receive from your primary mentor, institution, or other entities if your contributions to guidelines on this topic generated a strong reaction from peers outside your institution?

N/A

## Advocacy and Policy Positions

8. Do you work for or are you a member of an organization with a stated position related to the topic of these guidelines, e.g., position statement, editorial, blog, amicus brief, or legislature or legal testimony?

No

Yes. Name of organization(s): \_\_\_\_

If yes, are you involved in formulating or voting for positions?

No

Yes

If yes, could recommendations of these guidelines conflict with policies you have promoted or are obligated to follow?

Don't know or not applicable

No

Yes

If yes, please explain:

## Professional Specialty

9. What is your primary profession? If you are a clinician, what is your clinical specialty or subspecialty?

Registered Nurse

10. Do you prescribe or otherwise recommend diagnostic tests or treatments that may be addressed by these guidelines?

No

Yes

If yes, please explain:

## Expected Interests

11. Do you expect new financial or nonfinancial interests relevant to the topic of these guidelines not already declared in Part A or Part B of this form?

No

Yes

If yes, please describe:

## Part C. Summary (ASH Internal Use)

ASH will review your disclosures and summarize here interests that are judged to be current, material, and with an affected company. You will then be invited to review our determinations and to agree to make all parts of this form (A, B and C) publicly available.

|                  |                                          |
|------------------|------------------------------------------|
| Guideline topic: | AML in Older Adults (systematic reviews) |
|------------------|------------------------------------------|

| <i>Approved to participate?</i> | <i>Reviewer name and date</i> | <i>Notes</i>                                                                                        |
|---------------------------------|-------------------------------|-----------------------------------------------------------------------------------------------------|
| Yes                             | Alexander 1/10/2020           | No current conflicts of interest. On 1/10/2020, Jamie Dawdy confirmed all information in this form. |
|                                 |                               |                                                                                                     |
|                                 |                               |                                                                                                     |
|                                 |                               |                                                                                                     |

Summarize all current material interests in affected companies described above:

| <i>Company</i> | <i>Description</i> | <i>Disclosure Date</i> | <i>ASH Notes</i> |
|----------------|--------------------|------------------------|------------------|
|                |                    |                        |                  |
|                |                    |                        |                  |
|                |                    |                        |                  |
|                |                    |                        |                  |

Notes:

|  |
|--|
|  |
|--|



# ASH Guidelines Researcher Declaration of Interests Form

## Part A. Material Interests in Companies

### Equity

1. Do you currently or in the past 24 months have you had equity in any for-profit company that develops, produces, markets, or distributes drugs, devices, services, or therapies used to diagnose, treat, monitor, manage, or alleviate health conditions? Equity includes stock, stock options, and other ownership interests but excludes diversified mutual fund shares.

No

Yes, as described below:

Add rows as needed for each equity interest.

| <i>Company</i> | <i>Description</i> | <i>Date Divested</i> | <i>For ASH Internal Use</i> |
|----------------|--------------------|----------------------|-----------------------------|
|                |                    |                      |                             |
|                |                    |                      |                             |
|                |                    |                      |                             |
|                |                    |                      |                             |

### Patents and Royalties

2. Do you currently or in the past 24 months have you owned patents for or received royalties from any intellectual property or product used to diagnose, treat, monitor, manage, or alleviate health conditions?

No

Yes, as described below:

Add rows as needed for each patent or royalty interest.





## Industry-Funded Research

4. Do you currently or in the past 24 months have you been involved in research funded or supported (e.g., in kind support) by any for-profit company that develops, produces, markets, or distributes drugs, devices, services, or therapies used to diagnose, treat, monitor, manage, or alleviate health conditions?

No

Yes, as described below:

Column 1 Name the company funding or supporting the research.

Column 2 Briefly describe the research project. Indicate if funding or support goes to you directly or to your institution.

Column 3 Describe your role: (a) national or overall principal investigator, (b) member of a steering committee of a study that does not have a principal investigator, (c) site or local investigator. If other than these options, please describe.

Column 4 Indicate when your involvement ended, if applicable. (If your involvement has not yet ended, indicate “current” or “ongoing.”)

Add rows as needed for each research project.

| <i>Company</i> | <i>Description of Research</i> | <i>My Role</i> | <i>End Date</i> | <i>For ASH Internal Use</i> |
|----------------|--------------------------------|----------------|-----------------|-----------------------------|
|                |                                |                |                 |                             |
|                |                                |                |                 |                             |
|                |                                |                |                 |                             |
|                |                                |                |                 |                             |
|                |                                |                |                 |                             |
|                |                                |                |                 |                             |
|                |                                |                |                 |                             |
|                |                                |                |                 |                             |
|                |                                |                |                 |                             |

## My Partner’s or Spouse’s Interests

5. Currently or in the past 24 months has *your partner or spouse* had any of the interests described in questions 1-4?

No

Yes, as described below:

Add rows as needed for each interest.

| <i>Company</i> | <i>Description</i> | <i>End Date</i> | <i>For ASH Internal Use</i> |
|----------------|--------------------|-----------------|-----------------------------|
|                |                    |                 |                             |
|                |                    |                 |                             |
|                |                    |                 |                             |

# Part B. Interests That Are Not Mainly Financial

You have been invited to participate as a researcher on systematic evidence reviews that will inform clinical practice guidelines by the American Society of Hematology on the following topic:

Acute Myeloid Leukemia in Older Adults

The questions that follow are designed to elicit information about personal beliefs, intellectual positions or opinions, institutional relationships, and other interests that are not mainly financial and that may be relevant to guidelines on the above topic.

## Personal Beliefs

1. Do you have strongly held beliefs related to the topic of these guidelines?

No

Yes

If yes, please explain:

## Previously Published Opinions

2. Have you ever authored, coauthored, or publicly provided an opinion related to the topic of these guidelines, e.g., a clinical practice guideline, textbook, review article, meeting poster or presentation, grand rounds talk, letter to the editor?

No

Yes

If yes, what were those views and where were they made?

## Research

3. Currently or in the past 24 months, have you been involved in a leadership role in any research project not already reported under Part A, Question 4, relevant to the topic of these guidelines, e.g., a research project funded by a nonprofit or governmental organization?

No

Yes, as described below:

Column 1 Name the entity funding the research.

Column 2 Describe the research project.

Column 3 Describe your role: (a) national or overall principal investigator, (b) member of a steering committee of a study that does not have a principal investigator, (c) site or local investigator. If other than these options, please describe.

Column 4 Indicate when your involvement ended, if applicable. (If your involvement has not yet ended, indicate “current” or “ongoing.”)

Add rows as needed for each research project.

| <i>Funder</i> | <i>Description of Research</i> | <i>My Role</i> | <i>End Date</i> |
|---------------|--------------------------------|----------------|-----------------|
|               |                                |                |                 |
|               |                                |                |                 |
|               |                                |                |                 |
|               |                                |                |                 |

## Institutional Relationships

4. Could your salary be affected by recommendations on this topic?

No

5. Do you generate revenues for your institution or employer by clinical activity, teaching, speaking, consulting, testifying, writing, or otherwise sharing your knowledge or opinions about this guideline topic?

Don't know

No

Yes

If yes, please explain:

6. Could your institution benefit or be harmed by recommendations of guidelines on this topic?

Don't know

No

Yes

If yes, please explain:

## Career Advancement

7. How would you characterize the support you would receive from your primary mentor, institution, or other entities if your contributions to guidelines on this topic generated a strong reaction from peers outside your institution?

Not sure.

## Advocacy and Policy Positions

8. Do you work for or are you a member of an organization with a stated position related to the topic of these guidelines, e.g., position statement, editorial, blog, amicus brief, or legislature or legal testimony?

No

Yes. Name of organization(s): \_\_\_\_

If yes, are you involved in formulating or voting for positions?

No

Yes

If yes, could recommendations of these guidelines conflict with policies you have promoted or are obligated to follow?

Don't know or not applicable

No

Yes

If yes, please explain:

## Professional Specialty

9. What is your primary profession? If you are a clinician, what is your clinical specialty or subspecialty?

Health Research Methodologist

10. Do you prescribe or otherwise recommend diagnostic tests or treatments that may be addressed by these guidelines?

No

Yes

If yes, please explain:

## Expected Interests

11. Do you expect new financial or nonfinancial interests relevant to the topic of these guidelines not already declared in Part A or Part B of this form?

No

Yes

If yes, please describe:

## Part C. Summary (ASH Internal Use)

ASH will review your disclosures and summarize here interests that are judged to be current, material, and with an affected company. You will then be invited to review our determinations and to agree to make all parts of this form (A, B and C) publicly available.

|                  |                                          |
|------------------|------------------------------------------|
| Guideline topic: | AML in Older Adults (systematic reviews) |
|------------------|------------------------------------------|

| <i>Approved to participate?</i> | <i>Reviewer name and date</i> | <i>Notes</i>                                                                                         |
|---------------------------------|-------------------------------|------------------------------------------------------------------------------------------------------|
| Yes                             | Alexander 1/10/2020           | No current conflicts of interest. On 1/10/2020, Tahira Devji confirmed all information in this form. |
|                                 |                               |                                                                                                      |
|                                 |                               |                                                                                                      |
|                                 |                               |                                                                                                      |

Summarize all current material interests in affected companies described above:

| <i>Company</i> | <i>Description</i> | <i>Disclosure Date</i> | <i>ASH Notes</i> |
|----------------|--------------------|------------------------|------------------|
|                |                    |                        |                  |
|                |                    |                        |                  |
|                |                    |                        |                  |
|                |                    |                        |                  |

Notes:

|  |
|--|
|  |
|--|





# ASH Guidelines Researcher Declaration of Interests Form

## Part A. Material Interests in Companies

### Equity

1. Do you currently or in the past 24 months have you had equity in any for-profit company that develops, produces, markets, or distributes drugs, devices, services, or therapies used to diagnose, treat, monitor, manage, or alleviate health conditions? Equity includes stock, stock options, and other ownership interests but excludes diversified mutual fund shares.

No

Yes, as described below:

Add rows as needed for each equity interest.

| <i>Company</i> | <i>Description</i> | <i>Date Divested</i> | <i>For ASH Internal Use</i> |
|----------------|--------------------|----------------------|-----------------------------|
|                |                    |                      |                             |
|                |                    |                      |                             |
|                |                    |                      |                             |
|                |                    |                      |                             |

### Patents and Royalties

2. Do you currently or in the past 24 months have you owned patents for or received royalties from any intellectual property or product used to diagnose, treat, monitor, manage, or alleviate health conditions?

No

Yes, as described below:

Add rows as needed for each patent or royalty interest.



## Industry-Funded Research

4. Do you currently or in the past 24 months have you been involved in research funded or supported (e.g., in kind support) by any for-profit company that develops, produces, markets, or distributes drugs, devices, services, or therapies used to diagnose, treat, monitor, manage, or alleviate health conditions?

No

Yes, as described below:

Column 1 Name the company funding or supporting the research.

Column 2 Briefly describe the research project. Indicate if funding or support goes to you directly or to your institution.

Column 3 Describe your role: (a) national or overall principal investigator, (b) member of a steering committee of a study that does not have a principal investigator, (c) site or local investigator. If other than these options, please describe.

Column 4 Indicate when your involvement ended, if applicable. (If your involvement has not yet ended, indicate “current” or “ongoing.”)

Add rows as needed for each research project.

| <i>Company</i> | <i>Description of Research</i> | <i>My Role</i> | <i>End Date</i> | <i>For ASH Internal Use</i> |
|----------------|--------------------------------|----------------|-----------------|-----------------------------|
|                |                                |                |                 |                             |
|                |                                |                |                 |                             |
|                |                                |                |                 |                             |
|                |                                |                |                 |                             |
|                |                                |                |                 |                             |
|                |                                |                |                 |                             |
|                |                                |                |                 |                             |
|                |                                |                |                 |                             |
|                |                                |                |                 |                             |

## My Partner’s or Spouse’s Interests

5. Currently or in the past 24 months has *your partner or spouse* had any of the interests described in questions 1-4?

No

Yes, as described below:

Add rows as needed for each interest.

| <i>Company</i> | <i>Description</i> | <i>End Date</i> | <i>For ASH Internal Use</i> |
|----------------|--------------------|-----------------|-----------------------------|
|                |                    |                 |                             |
|                |                    |                 |                             |
|                |                    |                 |                             |

# Part B. Interests That Are Not Mainly Financial

You have been invited to participate as a researcher on systematic evidence reviews that will inform clinical practice guidelines by the American Society of Hematology on the following topic:

Acute Myeloid Leukemia in Older adults

The questions that follow are designed to elicit information about personal beliefs, intellectual positions or opinions, institutional relationships, and other interests that are not mainly financial and that may be relevant to guidelines on the above topic.

## Personal Beliefs

1. Do you have strongly held beliefs related to the topic of these guidelines?

No

Yes

If yes, please explain:

## Previously Published Opinions

2. Have you ever authored, coauthored, or publicly provided an opinion related to the topic of these guidelines, e.g., a clinical practice guideline, textbook, review article, meeting poster or presentation, grand rounds talk, letter to the editor?

No

Yes

If yes, what were those views and where were they made?

## Research

3. Currently or in the past 24 months, have you been involved in a leadership role in any research project not already reported under Part A, Question 4, relevant to the topic of these guidelines, e.g., a research project funded by a nonprofit or governmental organization?

No

Yes, as described below:

Column 1 Name the entity funding the research.

Column 2 Describe the research project.

Column 3 Describe your role: (a) national or overall principal investigator, (b) member of a steering committee of a study that does not have a principal investigator, (c) site or local investigator. If other than these options, please describe.

Column 4 Indicate when your involvement ended, if applicable. (If your involvement has not yet ended, indicate “current” or “ongoing.”)

Add rows as needed for each research project.

| <i>Funder</i> | <i>Description of Research</i> | <i>My Role</i> | <i>End Date</i> |
|---------------|--------------------------------|----------------|-----------------|
|               |                                |                |                 |
|               |                                |                |                 |
|               |                                |                |                 |
|               |                                |                |                 |

## Institutional Relationships

4. Could your salary be affected by recommendations on this topic?

No

5. Do you generate revenues for your institution or employer by clinical activity, teaching, speaking, consulting, testifying, writing, or otherwise sharing your knowledge or opinions about this guideline topic?

Don't know

No

Yes

If yes, please explain:

6. Could your institution benefit or be harmed by recommendations of guidelines on this topic?

Don't know

No

Yes

If yes, please explain:

## Career Advancement

7. How would you characterize the support you would receive from your primary mentor, institution, or other entities if your contributions to guidelines on this topic generated a strong reaction from peers outside your institution?

## Advocacy and Policy Positions

8. Do you work for or are you a member of an organization with a stated position related to the topic of these guidelines, e.g., position statement, editorial, blog, amicus brief, or legislature or legal testimony?

No

Yes. Name of organization(s): \_\_\_\_

If yes, are you involved in formulating or voting for positions?

No

Yes

If yes, could recommendations of these guidelines conflict with policies you have promoted or are obligated to follow?

Don't know or not applicable

No

Yes

If yes, please explain:

## Professional Specialty

9. What is your primary profession? If you are a clinician, what is your clinical specialty or subspecialty?

Epidemiologist

10. Do you prescribe or otherwise recommend diagnostic tests or treatments that may be addressed by these guidelines?

No

Yes

If yes, please explain:

## Expected Interests

11. Do you expect new financial or nonfinancial interests relevant to the topic of these guidelines not already declared in Part A or Part B of this form?

No

Yes

If yes, please describe:



## Part C. Summary (ASH Internal Use)

ASH will review your disclosures and summarize here interests that are judged to be current, material, and with an affected company. You will then be invited to review our determinations and to agree to make all parts of this form (A, B and C) publicly available.

|                  |                                          |
|------------------|------------------------------------------|
| Guideline topic: | AML in Older Adults (systematic reviews) |
|------------------|------------------------------------------|

| <i>Approved to participate?</i> | <i>Reviewer name and date</i> | <i>Notes</i>                                                                                      |
|---------------------------------|-------------------------------|---------------------------------------------------------------------------------------------------|
| Yes                             | Alexander 1/10/2020           | No current conflicts of interest. On 1/14/2020, Mi Ah Han confirmed all information in this form. |
|                                 |                               |                                                                                                   |
|                                 |                               |                                                                                                   |
|                                 |                               |                                                                                                   |

Summarize all current material interests in affected companies described above:

| <i>Company</i> | <i>Description</i> | <i>Disclosure Date</i> | <i>ASH Notes</i> |
|----------------|--------------------|------------------------|------------------|
|                |                    |                        |                  |
|                |                    |                        |                  |
|                |                    |                        |                  |
|                |                    |                        |                  |

Notes:

|  |
|--|
|  |
|--|



# ASH Guidelines Researcher Declaration of Interests Form

## Part A. Material Interests in Companies

### Equity

1. Do you currently or in the past 24 months have you had equity in any for-profit company that develops, produces, markets, or distributes drugs, devices, services, or therapies used to diagnose, treat, monitor, manage, or alleviate health conditions? Equity includes stock, stock options, and other ownership interests but excludes diversified mutual fund shares.

No

Yes, as described below:

Add rows as needed for each equity interest.

| <i>Company</i> | <i>Description</i> | <i>Date Divested</i> | <i>For ASH Internal Use</i> |
|----------------|--------------------|----------------------|-----------------------------|
|                |                    |                      |                             |
|                |                    |                      |                             |
|                |                    |                      |                             |
|                |                    |                      |                             |

### Patents and Royalties

2. Do you currently or in the past 24 months have you owned patents for or received royalties from any intellectual property or product used to diagnose, treat, monitor, manage, or alleviate health conditions?

No

Yes, as described below:

Add rows as needed for each patent or royalty interest.



## Industry-Funded Research

4. Do you currently or in the past 24 months have you been involved in research funded or supported (e.g., in kind support) by any for-profit company that develops, produces, markets, or distributes drugs, devices, services, or therapies used to diagnose, treat, monitor, manage, or alleviate health conditions?

No

Yes, as described below:

Column 1 Name the company funding or supporting the research.

Column 2 Briefly describe the research project. Indicate if funding or support goes to you directly or to your institution.

Column 3 Describe your role: (a) national or overall principal investigator, (b) member of a steering committee of a study that does not have a principal investigator, (c) site or local investigator. If other than these options, please describe.

Column 4 Indicate when your involvement ended, if applicable. (If your involvement has not yet ended, indicate “current” or “ongoing.”)

Add rows as needed for each research project.

| <i>Company</i> | <i>Description of Research</i> | <i>My Role</i> | <i>End Date</i> | <i>For ASH Internal Use</i> |
|----------------|--------------------------------|----------------|-----------------|-----------------------------|
|                |                                |                |                 |                             |
|                |                                |                |                 |                             |
|                |                                |                |                 |                             |
|                |                                |                |                 |                             |
|                |                                |                |                 |                             |
|                |                                |                |                 |                             |
|                |                                |                |                 |                             |
|                |                                |                |                 |                             |
|                |                                |                |                 |                             |

## My Partner’s or Spouse’s Interests

5. Currently or in the past 24 months has *your partner or spouse* had any of the interests described in questions 1-4?

No

Yes, as described below:

Add rows as needed for each interest.

| <i>Company</i> | <i>Description</i> | <i>End Date</i> | <i>For ASH Internal Use</i> |
|----------------|--------------------|-----------------|-----------------------------|
|                |                    |                 |                             |
|                |                    |                 |                             |
|                |                    |                 |                             |

# Part B. Interests That Are Not Mainly Financial

You have been invited to participate as a researcher on systematic evidence reviews that will inform clinical practice guidelines by the American Society of Hematology on the following topic:

Acute Myeloid Leukemia in Older Adults

The questions that follow are designed to elicit information about personal beliefs, intellectual positions or opinions, institutional relationships, and other interests that are not mainly financial and that may be relevant to guidelines on the above topic.

## Personal Beliefs

1. Do you have strongly held beliefs related to the topic of these guidelines?

No

Yes

If yes, please explain:

## Previously Published Opinions

2. Have you ever authored, coauthored, or publicly provided an opinion related to the topic of these guidelines, e.g., a clinical practice guideline, textbook, review article, meeting poster or presentation, grand rounds talk, letter to the editor?

No

Yes

If yes, what were those views and where were they made?

## Research

3. Currently or in the past 24 months, have you been involved in a leadership role in any research project not already reported under Part A, Question 4, relevant to the topic of these guidelines, e.g., a research project funded by a nonprofit or governmental organization?

No

Yes, as described below:

Column 1 Name the entity funding the research.

Column 2 Describe the research project.

Column 3 Describe your role: (a) national or overall principal investigator, (b) member of a steering committee of a study that does not have a principal investigator, (c) site or local investigator. If other than these options, please describe.

Column 4 Indicate when your involvement ended, if applicable. (If your involvement has not yet ended, indicate “current” or “ongoing.”)

Add rows as needed for each research project.

| <i>Funder</i> | <i>Description of Research</i> | <i>My Role</i> | <i>End Date</i> |
|---------------|--------------------------------|----------------|-----------------|
|               |                                |                |                 |
|               |                                |                |                 |
|               |                                |                |                 |
|               |                                |                |                 |

### Institutional Relationships

4. Could your salary be affected by recommendations on this topic?

No

5. Do you generate revenues for your institution or employer by clinical activity, teaching, speaking, consulting, testifying, writing, or otherwise sharing your knowledge or opinions about this guideline topic?

Don't know

No

Yes

If yes, please explain:

6. Could your institution benefit or be harmed by recommendations of guidelines on this topic?

Don't know

No

Yes

If yes, please explain:

## Career Advancement

7. How would you characterize the support you would receive from your primary mentor, institution, or other entities if your contributions to guidelines on this topic generated a strong reaction from peers outside your institution?

Probability no support.

## Advocacy and Policy Positions

8. Do you work for or are you a member of an organization with a stated position related to the topic of these guidelines, e.g., position statement, editorial, blog, amicus brief, or legislature or legal testimony?

No

Yes. Name of organization(s): \_\_\_\_

If yes, are you involved in formulating or voting for positions?

No

Yes

If yes, could recommendations of these guidelines conflict with policies you have promoted or are obligated to follow?

Don't know or not applicable

No

Yes

If yes, please explain:

## Professional Specialty

9. What is your primary profession? If you are a clinician, what is your clinical specialty or subspecialty?

Clinician and Methodologist of systematic reviews, Geriatrician

10. Do you prescribe or otherwise recommend diagnostic tests or treatments that may be addressed by these guidelines?

No

Yes



If yes, please explain:

## Expected Interests

11. Do you expect new financial or nonfinancial interests relevant to the topic of these guidelines not already declared in Part A or Part B of this form?

No

Yes

If yes, please describe:

## Part C. Summary (ASH Internal Use)

ASH will review your disclosures and summarize here interests that are judged to be current, material, and with an affected company. You will then be invited to review our determinations and to agree to make all parts of this form (A, B and C) publicly available.

|                  |                                          |
|------------------|------------------------------------------|
| Guideline topic: | AML in Older Adults (systematic reviews) |
|------------------|------------------------------------------|

| <i>Approved to participate?</i> | <i>Reviewer name and date</i> | <i>Notes</i>                                                                                       |
|---------------------------------|-------------------------------|----------------------------------------------------------------------------------------------------|
| Yes                             | Alexander 1/13/2020           | No current conflicts of interest. On 1/13/2020, QiuKui Hao confirmed all information in this form. |
|                                 |                               |                                                                                                    |
|                                 |                               |                                                                                                    |
|                                 |                               |                                                                                                    |

Summarize all current material interests in affected companies described above:

| <i>Company</i> | <i>Description</i> | <i>Disclosure Date</i> | <i>ASH Notes</i> |
|----------------|--------------------|------------------------|------------------|
|                |                    |                        |                  |
|                |                    |                        |                  |
|                |                    |                        |                  |
|                |                    |                        |                  |

Notes:

|  |
|--|
|  |
|--|



# ASH Guidelines Researcher Declaration of Interests Form

## Part A. Material Interests in Companies

### Equity

1. Do you currently or in the past 24 months have you had equity in any for-profit company that develops, produces, markets, or distributes drugs, devices, services, or therapies used to diagnose, treat, monitor, manage, or alleviate health conditions? Equity includes stock, stock options, and other ownership interests but excludes diversified mutual fund shares.

No

Yes, as described below:

Add rows as needed for each equity interest.

| <i>Company</i> | <i>Description</i> | <i>Date Divested</i> | <i>For ASH Internal Use</i> |
|----------------|--------------------|----------------------|-----------------------------|
|                |                    |                      |                             |
|                |                    |                      |                             |
|                |                    |                      |                             |
|                |                    |                      |                             |

### Patents and Royalties

2. Do you currently or in the past 24 months have you owned patents for or received royalties from any intellectual property or product used to diagnose, treat, monitor, manage, or alleviate health conditions?

No

Yes, as described below:

Add rows as needed for each patent or royalty interest.

| <i>Company</i> | <i>Description</i> | <i>Date Divested</i> | <i>For ASH Internal Use</i> |
|----------------|--------------------|----------------------|-----------------------------|
|                |                    |                      |                             |



## Industry-Funded Research

4. Do you currently or in the past 24 months have you been involved in research funded or supported (e.g., in kind support) by any for-profit company that develops, produces, markets, or distributes drugs, devices, services, or therapies used to diagnose, treat, monitor, manage, or alleviate health conditions?

No

Yes, as described below:

Column 1 Name the company funding or supporting the research.

Column 2 Briefly describe the research project. Indicate if funding or support goes to you directly or to your institution.

Column 3 Describe your role: (a) national or overall principal investigator, (b) member of a steering committee of a study that does not have a principal investigator, (c) site or local investigator. If other than these options, please describe.

Column 4 Indicate when your involvement ended, if applicable. (If your involvement has not yet ended, indicate “current” or “ongoing.”)

Add rows as needed for each research project.

| <i>Company</i> | <i>Description of Research</i> | <i>My Role</i> | <i>End Date</i> | <i>For ASH Internal Use</i> |
|----------------|--------------------------------|----------------|-----------------|-----------------------------|
|                |                                |                |                 |                             |
|                |                                |                |                 |                             |
|                |                                |                |                 |                             |
|                |                                |                |                 |                             |
|                |                                |                |                 |                             |
|                |                                |                |                 |                             |
|                |                                |                |                 |                             |
|                |                                |                |                 |                             |
|                |                                |                |                 |                             |

## My Partner’s or Spouse’s Interests

5. Currently or in the past 24 months has your partner or spouse had any of the interests described in questions 1-4?

No

Yes, as described below:

Add rows as needed for each interest.

| <i>Company</i> | <i>Description</i> | <i>End Date</i> | <i>For ASH Internal Use</i> |
|----------------|--------------------|-----------------|-----------------------------|
|                |                    |                 |                             |
|                |                    |                 |                             |
|                |                    |                 |                             |

## Part B. Interests That Are Not Mainly Financial

You have been invited to participate as a researcher on systematic evidence reviews that will inform clinical practice guidelines by the American Society of Hematology on the following topic:

Acute Myeloid Leukemia in Older Adults

The questions that follow are designed to elicit information about personal beliefs, intellectual positions or opinions, institutional relationships, and other interests that are not mainly financial and that may be relevant to guidelines on the above topic.

### Personal Beliefs

1. Do you have strongly held beliefs related to the topic of these guidelines?

No

Yes

If yes, please explain:

### Previously Published Opinions

2. Have you ever authored, coauthored, or publicly provided an opinion related to the topic of these guidelines, e.g., a clinical practice guideline, textbook, review article, meeting poster or presentation, grand rounds talk, letter to the editor?

No

Yes

If yes, what were those views and where were they made?

### Research

3. Currently or in the past 24 months, have you been involved in a leadership role in any research project not already reported under Part A, Question 4, relevant to the topic of these guidelines, e.g., a research project funded by a nonprofit or governmental organization?

No

Yes, as described below:

Column 1 Name the entity funding the research.

Column 2 Describe the research project.

Column 3 Describe your role: (a) national or overall principal investigator, (b) member of a steering committee of a study that does not have a principal investigator, (c) site or local investigator. If other than these options, please describe.

Column 4 Indicate when your involvement ended, if applicable. (If your involvement has not yet ended, indicate “current” or “ongoing.”)

Add rows as needed for each research project.

| <i>Funder</i> | <i>Description of Research</i> | <i>My Role</i> | <i>End Date</i> |
|---------------|--------------------------------|----------------|-----------------|
|               |                                |                |                 |
|               |                                |                |                 |
|               |                                |                |                 |
|               |                                |                |                 |

## Institutional Relationships

4. Could your salary be affected by recommendations on this topic?

No

5. Do you generate revenues for your institution or employer by clinical activity, teaching, speaking, consulting, testifying, writing, or otherwise sharing your knowledge or opinions about this guideline topic?

Don't know

No

Yes

If yes, please explain:

6. Could your institution benefit or be harmed by recommendations of guidelines on this topic?

Don't know

No

Yes

If yes, please explain:



## Career Advancement

7. How would you characterize the support you would receive from your primary mentor, institution, or other entities if your contributions to guidelines on this topic generated a strong reaction from peers outside your institution?

Unsure.

## Advocacy and Policy Positions

8. Do you work for or are you a member of an organization with a stated position related to the topic of these guidelines, e.g., position statement, editorial, blog, amicus brief, or legislature or legal testimony?

No

Yes. Name of organization(s): \_\_\_\_

If yes, are you involved in formulating or voting for positions?

No

Yes

If yes, could recommendations of these guidelines conflict with policies you have promoted or are obligated to follow?

Don't know or not applicable

No

Yes

If yes, please explain:

## Professional Specialty

9. What is your primary profession? If you are a clinician, what is your clinical specialty or subspecialty?

Resident in Internal Medicine.

10. Do you prescribe or otherwise recommend diagnostic tests or treatments that may be addressed by these guidelines?

No

Yes

If yes, please explain:

## Expected Interests

11. Do you expect new financial or nonfinancial interests relevant to the topic of these guidelines not already declared in Part A or Part B of this form?

No

Yes

If yes, please describe:

## Part C. Summary (ASH Internal Use)

ASH will review your disclosures and summarize here interests that are judged to be current, material, and with an affected company. You will then be invited to review our determinations and to agree to make all parts of this form (A, B and C) publicly available.

|                  |                                          |
|------------------|------------------------------------------|
| Guideline topic: | AML in Older Adults (systematic reviews) |
|------------------|------------------------------------------|

| <i>Approved to participate?</i> | <i>Reviewer name and date</i> | <i>Notes</i>                                                                                             |
|---------------------------------|-------------------------------|----------------------------------------------------------------------------------------------------------|
| Yes                             | Alexander 1/10/2020           | No current conflicts of interest. On 1/11/2020, Leah Kosyakovsky confirmed all information in this form. |
|                                 |                               |                                                                                                          |
|                                 |                               |                                                                                                          |
|                                 |                               |                                                                                                          |

Summarize all current material interests in affected companies described above:

| <i>Company</i> | <i>Description</i> | <i>Disclosure Date</i> | <i>ASH Notes</i> |
|----------------|--------------------|------------------------|------------------|
|                |                    |                        |                  |
|                |                    |                        |                  |
|                |                    |                        |                  |
|                |                    |                        |                  |

Notes:

|  |
|--|
|  |
|--|



# ASH Guidelines Researcher Declaration of Interests Form

## Part A. Material Interests in Companies

### Equity

1. Do you currently or in the past 24 months have you had equity in any for-profit company that develops, produces, markets, or distributes drugs, devices, services, or therapies used to diagnose, treat, monitor, manage, or alleviate health conditions? Equity includes stock, stock options, and other ownership interests but excludes diversified mutual fund shares.

No

Yes, as described below:

Add rows as needed for each equity interest.

| <i>Company</i> | <i>Description</i> | <i>Date Divested</i> | <i>For ASH Internal Use</i> |
|----------------|--------------------|----------------------|-----------------------------|
|                |                    |                      |                             |
|                |                    |                      |                             |
|                |                    |                      |                             |
|                |                    |                      |                             |

### Patents and Royalties

2. Do you currently or in the past 24 months have you owned patents for or received royalties from any intellectual property or product used to diagnose, treat, monitor, manage, or alleviate health conditions?

No

Yes, as described below:

Add rows as needed for each patent or royalty interest.



## Industry-Funded Research

4. Do you currently or in the past 24 months have you been involved in research funded or supported (e.g., in kind support) by any for-profit company that develops, produces, markets, or distributes drugs, devices, services, or therapies used to diagnose, treat, monitor, manage, or alleviate health conditions?

No

Yes, as described below:

Column 1 Name the company funding or supporting the research.

Column 2 Briefly describe the research project. Indicate if funding or support goes to you directly or to your institution.

Column 3 Describe your role: (a) national or overall principal investigator, (b) member of a steering committee of a study that does not have a principal investigator, (c) site or local investigator. If other than these options, please describe.

Column 4 Indicate when your involvement ended, if applicable. (If your involvement has not yet ended, indicate “current” or “ongoing.”)

Add rows as needed for each research project.

| <i>Company</i> | <i>Description of Research</i> | <i>My Role</i> | <i>End Date</i> | <i>For ASH Internal Use</i> |
|----------------|--------------------------------|----------------|-----------------|-----------------------------|
|                |                                |                |                 |                             |
|                |                                |                |                 |                             |
|                |                                |                |                 |                             |
|                |                                |                |                 |                             |
|                |                                |                |                 |                             |
|                |                                |                |                 |                             |
|                |                                |                |                 |                             |
|                |                                |                |                 |                             |
|                |                                |                |                 |                             |

## My Partner’s or Spouse’s Interests

5. Currently or in the past 24 months has *your partner or spouse* had any of the interests described in questions 1-4?

No

Yes, as described below:

Add rows as needed for each interest.

| <i>Company</i> | <i>Description</i> | <i>End Date</i> | <i>For ASH Internal Use</i> |
|----------------|--------------------|-----------------|-----------------------------|
|                |                    |                 |                             |
|                |                    |                 |                             |
|                |                    |                 |                             |

## Part B. Interests That Are Not Mainly Financial

You have been invited to participate as a researcher on systematic evidence reviews that will inform clinical practice guidelines by the American Society of Hematology on the following topic:

Acute Myeloid Leukemia in Older Adults

The questions that follow are designed to elicit information about personal beliefs, intellectual positions or opinions, institutional relationships, and other interests that are not mainly financial and that may be relevant to guidelines on the above topic.

### Personal Beliefs

1. Do you have strongly held beliefs related to the topic of these guidelines?

No

Yes

If yes, please explain:

### Previously Published Opinions

2. Have you ever authored, coauthored, or publicly provided an opinion related to the topic of these guidelines, e.g., a clinical practice guideline, textbook, review article, meeting poster or presentation, grand rounds talk, letter to the editor?

No

Yes

If yes, what were those views and where were they made?

### Research

3. Currently or in the past 24 months, have you been involved in a leadership role in any research project not already reported under Part A, Question 4, relevant to the topic of these guidelines, e.g., a research project funded by a nonprofit or governmental organization?

No



Yes, as described below:

Column 1 Name the entity funding the research.

Column 2 Describe the research project.

Column 3 Describe your role: (a) national or overall principal investigator, (b) member of a steering committee of a study that does not have a principal investigator, (c) site or local investigator. If other than these options, please describe.

Column 4 Indicate when your involvement ended, if applicable. (If your involvement has not yet ended, indicate “current” or “ongoing.”)

Add rows as needed for each research project.

| <i>Funder</i> | <i>Description of Research</i> | <i>My Role</i> | <i>End Date</i> |
|---------------|--------------------------------|----------------|-----------------|
|               |                                |                |                 |
|               |                                |                |                 |
|               |                                |                |                 |
|               |                                |                |                 |

## Institutional Relationships

4. Could your salary be affected by recommendations on this topic?

No

5. Do you generate revenues for your institution or employer by clinical activity, teaching, speaking, consulting, testifying, writing, or otherwise sharing your knowledge or opinions about this guideline topic?

Don't know

No

Yes

If yes, please explain:

6. Could your institution benefit or be harmed by recommendations of guidelines on this topic?

Don't know

No

Yes

If yes, please explain:

## Career Advancement

7. How would you characterize the support you would receive from your primary mentor, institution, or other entities if your contributions to guidelines on this topic generated a strong reaction from peers outside your institution?

There would be no change in the support I currently receive from my institution

## Advocacy and Policy Positions

8. Do you work for or are you a member of an organization with a stated position related to the topic of these guidelines, e.g., position statement, editorial, blog, amicus brief, or legislature or legal testimony?

No

Yes. Name of organization(s): \_\_\_\_

If yes, are you involved in formulating or voting for positions?

No

Yes

If yes, could recommendations of these guidelines conflict with policies you have promoted or are obligated to follow?

Don't know or not applicable

No

Yes

If yes, please explain:

## Professional Specialty

9. What is your primary profession? If you are a clinician, what is your clinical specialty or subspecialty?

I am an epidemiologist who teaches to undergraduate students in Public Health.

10. Do you prescribe or otherwise recommend diagnostic tests or treatments that may be addressed by these guidelines?

No

Yes

If yes, please explain:

## Expected Interests

11. Do you expect new financial or nonfinancial interests relevant to the topic of these guidelines not already declared in Part A or Part B of this form?

No

Yes

If yes, please describe:

## Part C. Summary (ASH Internal Use)

ASH will review your disclosures and summarize here interests that are judged to be current, material, and with an affected company. You will then be invited to review our determinations and to agree to make all parts of this form (A, B and C) publicly available.

|                  |                                          |
|------------------|------------------------------------------|
| Guideline topic: | AML in Older Adults (systematic reviews) |
|------------------|------------------------------------------|

| <i>Approved to participate?</i> | <i>Reviewer name and date</i> | <i>Notes</i>                                                                                                 |
|---------------------------------|-------------------------------|--------------------------------------------------------------------------------------------------------------|
| Yes                             | Alexander 1/13/2020           | No current conflicts of interest. On 1/13/2020, Fernando Kenji Nampo confirmed all information in this form. |
|                                 |                               |                                                                                                              |
|                                 |                               |                                                                                                              |
|                                 |                               |                                                                                                              |

Summarize all current material interests in affected companies described above:

| <i>Company</i> | <i>Description</i> | <i>Disclosure Date</i> | <i>ASH Notes</i> |
|----------------|--------------------|------------------------|------------------|
|                |                    |                        |                  |
|                |                    |                        |                  |
|                |                    |                        |                  |
|                |                    |                        |                  |

Notes:

|  |
|--|
|  |
|--|



# ASH Guidelines Researcher Declaration of Interests Form

## Part A. Material Interests in Companies

### Equity

1. Do you currently or in the past 24 months have you had equity in any for-profit company that develops, produces, markets, or distributes drugs, devices, services, or therapies used to diagnose, treat, monitor, manage, or alleviate health conditions? Equity includes stock, stock options, and other ownership interests but excludes diversified mutual fund shares.

No

Yes, as described below:

Add rows as needed for each equity interest.

| <i>Company</i> | <i>Description</i> | <i>Date Divested</i> | <i>For ASH Internal Use</i> |
|----------------|--------------------|----------------------|-----------------------------|
|                |                    |                      |                             |
|                |                    |                      |                             |
|                |                    |                      |                             |
|                |                    |                      |                             |

### Patents and Royalties

2. Do you currently or in the past 24 months have you owned patents for or received royalties from any intellectual property or product used to diagnose, treat, monitor, manage, or alleviate health conditions?

No

Yes, as described below:

Add rows as needed for each patent or royalty interest.

| <i>Company</i> | <i>Description</i> | <i>Date Divested</i> | <i>For ASH Internal Use</i> |
|----------------|--------------------|----------------------|-----------------------------|
|                |                    |                      |                             |



## Industry-Funded Research

4. Do you currently or in the past 24 months have you been involved in research funded or supported (e.g., in kind support) by any for-profit company that develops, produces, markets, or distributes drugs, devices, services, or therapies used to diagnose, treat, monitor, manage, or alleviate health conditions?

No

Yes, as described below:

Column 1 Name the company funding or supporting the research.

Column 2 Briefly describe the research project. Indicate if funding or support goes to you directly or to your institution.

Column 3 Describe your role: (a) national or overall principal investigator, (b) member of a steering committee of a study that does not have a principal investigator, (c) site or local investigator. If other than these options, please describe.

Column 4 Indicate when your involvement ended, if applicable. (If your involvement has not yet ended, indicate “current” or “ongoing.”)

Add rows as needed for each research project.

| <i>Company</i> | <i>Description of Research</i> | <i>My Role</i> | <i>End Date</i> | <i>For ASH Internal Use</i> |
|----------------|--------------------------------|----------------|-----------------|-----------------------------|
|                |                                |                |                 |                             |
|                |                                |                |                 |                             |
|                |                                |                |                 |                             |
|                |                                |                |                 |                             |
|                |                                |                |                 |                             |
|                |                                |                |                 |                             |
|                |                                |                |                 |                             |
|                |                                |                |                 |                             |
|                |                                |                |                 |                             |

## My Partner’s or Spouse’s Interests

5. Currently or in the past 24 months has *your partner or spouse* had any of the interests described in questions 1-4?

No

Yes, as described below:

Add rows as needed for each interest.

| <i>Company</i> | <i>Description</i> | <i>End Date</i> | <i>For ASH Internal Use</i> |
|----------------|--------------------|-----------------|-----------------------------|
|                |                    |                 |                             |
|                |                    |                 |                             |
|                |                    |                 |                             |



# Part B. Interests That Are Not Mainly Financial

You have been invited to participate as a researcher on systematic evidence reviews that will inform clinical practice guidelines by the American Society of Hematology on the following topic:

Acute Myeloid Leukemia in Older Adults

The questions that follow are designed to elicit information about personal beliefs, intellectual positions or opinions, institutional relationships, and other interests that are not mainly financial and that may be relevant to guidelines on the above topic.

## Personal Beliefs

1. Do you have strongly held beliefs related to the topic of these guidelines?

No

Yes

If yes, please explain:

## Previously Published Opinions

2. Have you ever authored, coauthored, or publicly provided an opinion related to the topic of these guidelines, e.g., a clinical practice guideline, textbook, review article, meeting poster or presentation, grand rounds talk, letter to the editor?

No

Yes

If yes, what were those views and where were they made?

## Research

3. Currently or in the past 24 months, have you been involved in a leadership role in any research project not already reported under Part A, Question 4, relevant to the topic of these guidelines, e.g., a research project funded by a nonprofit or governmental organization?

No

Yes, as described below:

Column 1 Name the entity funding the research.

Column 2 Describe the research project.

Column 3 Describe your role: (a) national or overall principal investigator, (b) member of a steering committee of a study that does not have a principal investigator, (c) site or local investigator. If other than these options, please describe.

Column 4 Indicate when your involvement ended, if applicable. (If your involvement has not yet ended, indicate “current” or “ongoing.”)

Add rows as needed for each research project.

| <i>Funder</i> | <i>Description of Research</i> | <i>My Role</i> | <i>End Date</i> |
|---------------|--------------------------------|----------------|-----------------|
|               |                                |                |                 |
|               |                                |                |                 |
|               |                                |                |                 |
|               |                                |                |                 |

### Institutional Relationships

4. Could your salary be affected by recommendations on this topic?

No

5. Do you generate revenues for your institution or employer by clinical activity, teaching, speaking, consulting, testifying, writing, or otherwise sharing your knowledge or opinions about this guideline topic?

Don't know

No

Yes

If yes, please explain:

6. Could your institution benefit or be harmed by recommendations of guidelines on this topic?

Don't know

No

Yes

If yes, please explain:

## Career Advancement

7. How would you characterize the support you would receive from your primary mentor, institution, or other entities if your contributions to guidelines on this topic generated a strong reaction from peers outside your institution?

Not applicable

## Advocacy and Policy Positions

8. Do you work for or are you a member of an organization with a stated position related to the topic of these guidelines, e.g., position statement, editorial, blog, amicus brief, or legislature or legal testimony?

No

Yes. Name of organization(s): \_\_\_\_

If yes, are you involved in formulating or voting for positions?

No

Yes

If yes, could recommendations of these guidelines conflict with policies you have promoted or are obligated to follow?

Don't know or not applicable

No

Yes

If yes, please explain:

## Professional Specialty

9. What is your primary profession? If you are a clinician, what is your clinical specialty or subspecialty?  
Clinician/Pediatrician

10. Do you prescribe or otherwise recommend diagnostic tests or treatments that may be addressed by these guidelines?

No

Yes

If yes, please explain:

## Expected Interests

11. Do you expect new financial or nonfinancial interests relevant to the topic of these guidelines not already declared in Part A or Part B of this form?

No

Yes

If yes, please describe:

## Part C. Summary (ASH Internal Use)

ASH will review your disclosures and summarize here interests that are judged to be current, material, and with an affected company. You will then be invited to review our determinations and to agree to make all parts of this form (A, B and C) publicly available.

|                  |                                          |
|------------------|------------------------------------------|
| Guideline topic: | AML in Older Adults (systematic reviews) |
|------------------|------------------------------------------|

| <i>Approved to participate?</i> | <i>Reviewer name and date</i> | <i>Notes</i>                                                                                            |
|---------------------------------|-------------------------------|---------------------------------------------------------------------------------------------------------|
| Yes                             | Alexander 1/14/2020           | No current conflicts of interest. On 1/14/2020, Shaneela Shahid confirmed all information in this form. |
|                                 |                               |                                                                                                         |
|                                 |                               |                                                                                                         |
|                                 |                               |                                                                                                         |

Summarize all current material interests in affected companies described above:

| <i>Company</i> | <i>Description</i> | <i>Disclosure Date</i> | <i>ASH Notes</i> |
|----------------|--------------------|------------------------|------------------|
|                |                    |                        |                  |
|                |                    |                        |                  |
|                |                    |                        |                  |
|                |                    |                        |                  |

Notes:

|  |
|--|
|  |
|--|



# ASH Guidelines Researcher Declaration of Interests Form

## Part A. Material Interests in Companies

### Equity

1. Do you currently or in the past 24 months have you had equity in any for-profit company that develops, produces, markets, or distributes drugs, devices, services, or therapies used to diagnose, treat, monitor, manage, or alleviate health conditions? Equity includes stock, stock options, and other ownership interests but excludes diversified mutual fund shares.

No

Yes, as described below:

Add rows as needed for each equity interest.

| <i>Company</i> | <i>Description</i> | <i>Date Divested</i> | <i>For ASH Internal Use</i> |
|----------------|--------------------|----------------------|-----------------------------|
|                |                    |                      |                             |
|                |                    |                      |                             |
|                |                    |                      |                             |
|                |                    |                      |                             |

### Patents and Royalties

2. Do you currently or in the past 24 months have you owned patents for or received royalties from any intellectual property or product used to diagnose, treat, monitor, manage, or alleviate health conditions?

No

Yes, as described below:

Add rows as needed for each patent or royalty interest.



## Industry-Funded Research

4. Do you currently or in the past 24 months have you been involved in research funded or supported (e.g., in kind support) by any for-profit company that develops, produces, markets, or distributes drugs, devices, services, or therapies used to diagnose, treat, monitor, manage, or alleviate health conditions?

No

Yes, as described below:

Column 1 Name the company funding or supporting the research.

Column 2 Briefly describe the research project. Indicate if funding or support goes to you directly or to your institution.

Column 3 Describe your role: (a) national or overall principal investigator, (b) member of a steering committee of a study that does not have a principal investigator, (c) site or local investigator. If other than these options, please describe.

Column 4 Indicate when your involvement ended, if applicable. (If your involvement has not yet ended, indicate “current” or “ongoing.”)

Add rows as needed for each research project.

| <i>Company</i> | <i>Description of Research</i> | <i>My Role</i> | <i>End Date</i> | <i>For ASH Internal Use</i> |
|----------------|--------------------------------|----------------|-----------------|-----------------------------|
|                |                                |                |                 |                             |
|                |                                |                |                 |                             |
|                |                                |                |                 |                             |
|                |                                |                |                 |                             |
|                |                                |                |                 |                             |
|                |                                |                |                 |                             |
|                |                                |                |                 |                             |
|                |                                |                |                 |                             |
|                |                                |                |                 |                             |

## My Partner’s or Spouse’s Interests

5. Currently or in the past 24 months has *your partner or spouse* had any of the interests described in questions 1-4?

No

Yes, as described below:



Add rows as needed for each interest.

| <i>Company</i> | <i>Description</i> | <i>End Date</i> | <i>For ASH Internal Use</i> |
|----------------|--------------------|-----------------|-----------------------------|
|                |                    |                 |                             |
|                |                    |                 |                             |
|                |                    |                 |                             |

# Part B. Interests That Are Not Mainly Financial

You have been invited to participate as a researcher on systematic evidence reviews that will inform clinical practice guidelines by the American Society of Hematology on the following topic:

Acute Myeloid Leukemia in Older Adults

The questions that follow are designed to elicit information about personal beliefs, intellectual positions or opinions, institutional relationships, and other interests that are not mainly financial and that may be relevant to guidelines on the above topic.

## Personal Beliefs

1. Do you have strongly held beliefs related to the topic of these guidelines?

No

Yes

If yes, please explain:

## Previously Published Opinions

2. Have you ever authored, coauthored, or publicly provided an opinion related to the topic of these guidelines, e.g., a clinical practice guideline, textbook, review article, meeting poster or presentation, grand rounds talk, letter to the editor?

No

Yes

If yes, what were those views and where were they made?

## Research

3. Currently or in the past 24 months, have you been involved in a leadership role in any research project not already reported under Part A, Question 4, relevant to the topic of these guidelines, e.g., a research project funded by a nonprofit or governmental organization?

No

Yes, as described below:

Column 1 Name the entity funding the research.

Column 2 Describe the research project.

Column 3 Describe your role: (a) national or overall principal investigator, (b) member of a steering committee of a study that does not have a principal investigator, (c) site or local investigator. If other than these options, please describe.

Column 4 Indicate when your involvement ended, if applicable. (If your involvement has not yet ended, indicate “current” or “ongoing.”)

Add rows as needed for each research project.

| <i>Funder</i> | <i>Description of Research</i> | <i>My Role</i> | <i>End Date</i> |
|---------------|--------------------------------|----------------|-----------------|
|               |                                |                |                 |
|               |                                |                |                 |
|               |                                |                |                 |
|               |                                |                |                 |

## Institutional Relationships

4. Could your salary be affected by recommendations on this topic?

No

5. Do you generate revenues for your institution or employer by clinical activity, teaching, speaking, consulting, testifying, writing, or otherwise sharing your knowledge or opinions about this guideline topic?

Don't know

No

Yes

If yes, please explain:

6. Could your institution benefit or be harmed by recommendations of guidelines on this topic?

Don't know

No

Yes

If yes, please explain:

## Career Advancement

7. How would you characterize the support you would receive from your primary mentor, institution, or other entities if your contributions to guidelines on this topic generated a strong reaction from peers outside your institution?

No specific support

## Advocacy and Policy Positions

8. Do you work for or are you a member of an organization with a stated position related to the topic of these guidelines, e.g., position statement, editorial, blog, amicus brief, or legislature or legal testimony?

No

Yes. Name of organization(s): \_\_\_\_

If yes, are you involved in formulating or voting for positions?

No

Yes

If yes, could recommendations of these guidelines conflict with policies you have promoted or are obligated to follow?

Don't know or not applicable

No

Yes

If yes, please explain:

## Professional Specialty

9. What is your primary profession? If you are a clinician, what is your clinical specialty or subspecialty?

Medical student

10. Do you prescribe or otherwise recommend diagnostic tests or treatments that may be addressed by these guidelines?

No

Yes

If yes, please explain:

## Expected Interests

11. Do you expect new financial or nonfinancial interests relevant to the topic of these guidelines not already declared in Part A or Part B of this form?

No

Yes

If yes, please describe:

## Part C. Summary (ASH Internal Use)

ASH will review your disclosures and summarize here interests that are judged to be current, material, and with an affected company. You will then be invited to review our determinations and to agree to make all parts of this form (A, B and C) publicly available.

|                  |                                          |
|------------------|------------------------------------------|
| Guideline topic: | AML in Older Adults (systematic reviews) |
|------------------|------------------------------------------|

| <i>Approved to participate?</i> | <i>Reviewer name and date</i> | <i>Notes</i>                                                                                         |
|---------------------------------|-------------------------------|------------------------------------------------------------------------------------------------------|
| Yes                             | Alexander 1/13/2020           | No current conflicts of interest. On 1/13/2020, Trevor Teich confirmed all information in this form. |
|                                 |                               |                                                                                                      |
|                                 |                               |                                                                                                      |
|                                 |                               |                                                                                                      |

Summarize all current material interests in affected companies described above:

| <i>Company</i> | <i>Description</i> | <i>Disclosure Date</i> | <i>ASH Notes</i> |
|----------------|--------------------|------------------------|------------------|
|                |                    |                        |                  |
|                |                    |                        |                  |
|                |                    |                        |                  |
|                |                    |                        |                  |

Notes:

|  |
|--|
|  |
|--|



# ASH Guidelines Researcher Declaration of Interests Form

## Part A. Material Interests in Companies

### Equity

1. Do you currently or in the past 24 months have you had equity in any for-profit company that develops, produces, markets, or distributes drugs, devices, services, or therapies used to diagnose, treat, monitor, manage, or alleviate health conditions? Equity includes stock, stock options, and other ownership interests but excludes diversified mutual fund shares.

No

Yes, as described below:

Add rows as needed for each equity interest.

| <i>Company</i> | <i>Description</i> | <i>Date Divested</i> | <i>For ASH Internal Use</i> |
|----------------|--------------------|----------------------|-----------------------------|
|                |                    |                      |                             |
|                |                    |                      |                             |
|                |                    |                      |                             |
|                |                    |                      |                             |

### Patents and Royalties

2. Do you currently or in the past 24 months have you owned patents for or received royalties from any intellectual property or product used to diagnose, treat, monitor, manage, or alleviate health conditions?

No

Yes, as described below:

Add rows as needed for each patent or royalty interest.





## Industry-Funded Research

4. Do you currently or in the past 24 months have you been involved in research funded or supported (e.g., in kind support) by any for-profit company that develops, produces, markets, or distributes drugs, devices, services, or therapies used to diagnose, treat, monitor, manage, or alleviate health conditions?

No

Yes, as described below:

Column 1 Name the company funding or supporting the research.

Column 2 Briefly describe the research project. Indicate if funding or support goes to you directly or to your institution.

Column 3 Describe your role: (a) national or overall principal investigator, (b) member of a steering committee of a study that does not have a principal investigator, (c) site or local investigator. If other than these options, please describe.

Column 4 Indicate when your involvement ended, if applicable. (If your involvement has not yet ended, indicate “current” or “ongoing.”)

Add rows as needed for each research project.

| <i>Company</i> | <i>Description of Research</i> | <i>My Role</i> | <i>End Date</i> | <i>For ASH Internal Use</i> |
|----------------|--------------------------------|----------------|-----------------|-----------------------------|
|                |                                |                |                 |                             |
|                |                                |                |                 |                             |
|                |                                |                |                 |                             |
|                |                                |                |                 |                             |
|                |                                |                |                 |                             |
|                |                                |                |                 |                             |
|                |                                |                |                 |                             |
|                |                                |                |                 |                             |
|                |                                |                |                 |                             |

## My Partner’s or Spouse’s Interests

5. Currently or in the past 24 months has *your partner or spouse* had any of the interests described in questions 1-4?

No

Yes, as described below:

Add rows as needed for each interest.

| <i>Company</i> | <i>Description</i> | <i>End Date</i> | <i>For ASH Internal Use</i> |
|----------------|--------------------|-----------------|-----------------------------|
|                |                    |                 |                             |
|                |                    |                 |                             |
|                |                    |                 |                             |

# Part B. Interests That Are Not Mainly Financial

You have been invited to participate as a researcher on systematic evidence reviews that will inform clinical practice guidelines by the American Society of Hematology on the following topic:

Acute Myeloid Leukemia in Older Adults

The questions that follow are designed to elicit information about personal beliefs, intellectual positions or opinions, institutional relationships, and other interests that are not mainly financial and that may be relevant to guidelines on the above topic.

## Personal Beliefs

1. Do you have strongly held beliefs related to the topic of these guidelines?

No

Yes

If yes, please explain:

## Previously Published Opinions

2. Have you ever authored, coauthored, or publicly provided an opinion related to the topic of these guidelines, e.g., a clinical practice guideline, textbook, review article, meeting poster or presentation, grand rounds talk, letter to the editor?

No

Yes

If yes, what were those views and where were they made?

## Research

3. Currently or in the past 24 months, have you been involved in a leadership role in any research project not already reported under Part A, Question 4, relevant to the topic of these guidelines, e.g., a research project funded by a nonprofit or governmental organization?

No

Yes, as described below:

Column 1 Name the entity funding the research.

Column 2 Describe the research project.

Column 3 Describe your role: (a) national or overall principal investigator, (b) member of a steering committee of a study that does not have a principal investigator, (c) site or local investigator. If other than these options, please describe.

Column 4 Indicate when your involvement ended, if applicable. (If your involvement has not yet ended, indicate "current" or "ongoing.")

Add rows as needed for each research project.

| <i>Funder</i> | <i>Description of Research</i> | <i>My Role</i> | <i>End Date</i> |
|---------------|--------------------------------|----------------|-----------------|
|               |                                |                |                 |
|               |                                |                |                 |
|               |                                |                |                 |
|               |                                |                |                 |

## Institutional Relationships

4. Could your salary be affected by recommendations on this topic?

No

5. Do you generate revenues for your institution or employer by clinical activity, teaching, speaking, consulting, testifying, writing, or otherwise sharing your knowledge or opinions about this guideline topic?

Don't know

No

Yes

If yes, please explain:

6. Could your institution benefit or be harmed by recommendations of guidelines on this topic?

Don't know

No

Yes

If yes, please explain:

## Career Advancement

7. How would you characterize the support you would receive from your primary mentor, institution, or other entities if your contributions to guidelines on this topic generated a strong reaction from peers outside your institution?

## Advocacy and Policy Positions

8. Do you work for or are you a member of an organization with a stated position related to the topic of these guidelines, e.g., position statement, editorial, blog, amicus brief, or legislature or legal testimony?

No

Yes. Name of organization(s): \_\_\_\_

If yes, are you involved in formulating or voting for positions?

No

Yes

If yes, could recommendations of these guidelines conflict with policies you have promoted or are obligated to follow?

Don't know or not applicable

No

Yes

If yes, please explain:

## Professional Specialty

9. What is your primary profession? If you are a clinician, what is your clinical specialty or subspecialty?

Resident physician, internal medicine

10. Do you prescribe or otherwise recommend diagnostic tests or treatments that may be addressed by these guidelines?

No

Yes

If yes, please explain:

## Expected Interests

11. Do you expect new financial or nonfinancial interests relevant to the topic of these guidelines not already declared in Part A or Part B of this form?

No

Yes

If yes, please describe:

# Part C. Summary (ASH Internal Use)

ASH will review your disclosures and summarize here interests that are judged to be current, material, and with an affected company. You will then be invited to review our determinations and to agree to make all parts of this form (A, B and C) publicly available.

|                  |                                          |
|------------------|------------------------------------------|
| Guideline topic: | AML in Older Adults (systematic reviews) |
|------------------|------------------------------------------|

| <i>Approved to participate?</i> | <i>Reviewer name and date</i> | <i>Notes</i>                                                                                         |
|---------------------------------|-------------------------------|------------------------------------------------------------------------------------------------------|
| Yes                             | Alexander 1/10/2020           | No current conflicts of interest. On 1/12/2020 Ambika Tejpal confirmed all information in this form. |
|                                 |                               |                                                                                                      |
|                                 |                               |                                                                                                      |
|                                 |                               |                                                                                                      |

Summarize all current material interests in affected companies described above:

| <i>Company</i> | <i>Description</i> | <i>Disclosure Date</i> | <i>ASH Notes</i> |
|----------------|--------------------|------------------------|------------------|
|                |                    |                        |                  |
|                |                    |                        |                  |
|                |                    |                        |                  |
|                |                    |                        |                  |

Notes:

|  |
|--|
|  |
|--|
